# Supplementary material for: The cancer-associated fibroblast-related signature predicts prognosis and indicates immune microenvironment infiltration in gastric cancer
Source: PubMed Central journal article supplement (PMC9372353; doi:10.3389/fimmu.2022.951214), 2022-07-29
Supplement: DataSheet_5.pdf [file DataSheet_5.pdf]

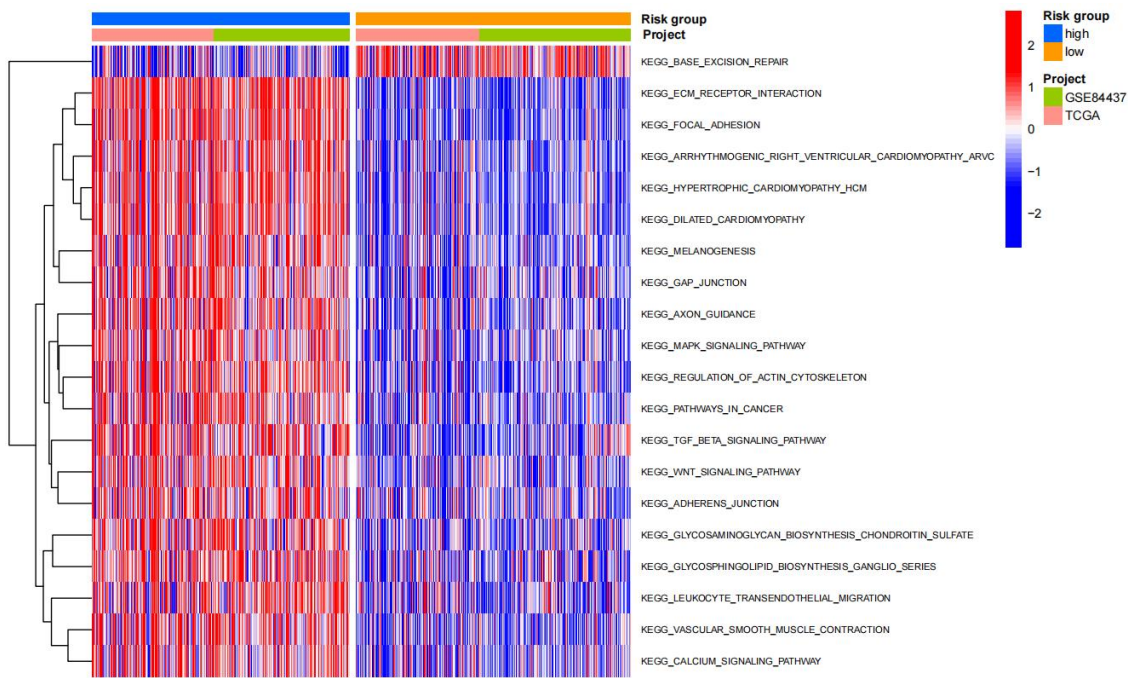

Supplementary Figure 5. GSVAs enrichment analysis between the different risk subgroups. GSVAs, gene set variation analysis.
