# Supplementary material for: The cancer-associated fibroblast-related signature predicts prognosis and indicates immune microenvironment infiltration in gastric cancer
Source: Front Immunol. 2022 Jul 29;13:951214. doi: 10.3389/fimmu.2022.951214 (PMC9372353; doi:10.3389/fimmu.2022.951214)
Supplement: Supplementary file 10 [file Table_3.xlsx]

## Sheet: S3
Supplementary Table 3 Functional annotation of the differentially expressed genes between the two CAFs-related gene subypes.
ONTOLOGY	ID	Description	GeneRatio	BgRatio	pvalue	p.adjust	qvalue	geneID	Count
BP	GO:0030198	extracellular matrix organization	72/326	393/18862	3.9107e-53	7.93639e-50	5.74043e-50	SPARC/COL8A1/TIMP2/DDR2/FAP/ECM2/COL6A3/COL3A1/FBN1/EFEMP2/FBLN2/SFRP2/DCN/JAM3/BGN/ANTXR1/CRISPLD2/EMILIN1/COL1A2/LUM/COL8A2/CTSK/COL6A2/AEBP1/LAMA4/CCDC80/LAMA2/COL5A1/COL15A1/GREM1/MFAP5/COL5A2/THBS1/VCAN/RECK/SULF1/HTRA1/COL14A1/CYP1B1/MMP2/FBLN1/MFAP4/COL6A1/FLRT2/JAM2/COL1A1/FBLN5/TNC/ITGA11/COL12A1/POSTN/ITGA5/SMOC2/COL10A1/TGFBI/ELN/CAV1/PDPN/ADAMTS2/FOXF1/MYH11/COL16A1/LOX/PDGFRA/ADAMTS1…	72
BP	GO:0043062	extracellular structure organization	72/326	394/18862	4.72031e-53	7.93639e-50	5.74043e-50	SPARC/COL8A1/TIMP2/DDR2/FAP/ECM2/COL6A3/COL3A1/FBN1/EFEMP2/FBLN2/SFRP2/DCN/JAM3/BGN/ANTXR1/CRISPLD2/EMILIN1/COL1A2/LUM/COL8A2/CTSK/COL6A2/AEBP1/LAMA4/CCDC80/LAMA2/COL5A1/COL15A1/GREM1/MFAP5/COL5A2/THBS1/VCAN/RECK/SULF1/HTRA1/COL14A1/CYP1B1/MMP2/FBLN1/MFAP4/COL6A1/FLRT2/JAM2/COL1A1/FBLN5/TNC/ITGA11/COL12A1/POSTN/ITGA5/SMOC2/COL10A1/TGFBI/ELN/CAV1/PDPN/ADAMTS2/FOXF1/MYH11/COL16A1/LOX/PDGFRA/ADAMTS1…	72
BP	GO:0045229	external encapsulating structure organization	72/326	396/18862	6.86539e-53	7.93639e-50	5.74043e-50	SPARC/COL8A1/TIMP2/DDR2/FAP/ECM2/COL6A3/COL3A1/FBN1/EFEMP2/FBLN2/SFRP2/DCN/JAM3/BGN/ANTXR1/CRISPLD2/EMILIN1/COL1A2/LUM/COL8A2/CTSK/COL6A2/AEBP1/LAMA4/CCDC80/LAMA2/COL5A1/COL15A1/GREM1/MFAP5/COL5A2/THBS1/VCAN/RECK/SULF1/HTRA1/COL14A1/CYP1B1/MMP2/FBLN1/MFAP4/COL6A1/FLRT2/JAM2/COL1A1/FBLN5/TNC/ITGA11/COL12A1/POSTN/ITGA5/SMOC2/COL10A1/TGFBI/ELN/CAV1/PDPN/ADAMTS2/FOXF1/MYH11/COL16A1/LOX/PDGFRA/ADAMTS1…	72
BP	GO:0030199	collagen fibril organization	22/326	54/18862	3.93173e-25	3.40881e-22	2.46561e-22	DDR2/COL3A1/EFEMP2/SFRP2/EMILIN1/COL1A2/LUM/AEBP1/COL5A1/GREM1/COL5A2/COL14A1/CYP1B1/COL1A1/COL12A1/ADAMTS2/LOX/FMOD/DPT/COMP/COL11A1/MMP11	22
BP	GO:0031589	cell-substrate adhesion	36/326	359/18862	1.54855e-17	1.07407e-14	7.76883e-15	COL8A1/ECM2/COL3A1/EFEMP2/FBLN2/SPOCK1/JAM3/ANTXR1/EMILIN1/FERMT2/CCDC80/THY1/GREM1/THBS1/AXL/LGALS1/FBLN1/COL1A1/FBLN5/TEK/ITGA11/POSTN/SFRP1/ITGA5/LIMS2/PDPN/EPHA3/SGCE/FOXF1/COL16A1/ITGBL1/SORBS1/FLNA/EPDR1/APOD/CCL21	36
BP	GO:0001503	ossification	35/326	401/18862	3.28676e-15	1.89975e-12	1.3741e-12	SPARC/CDH11/DDR2/TGFB3/SFRP2/COL1A2/FERMT2/VEGFC/OMD/PRKD1/GREM1/MGP/COL5A2/VCAN/TMEM119/ROR2/CLEC11A/MMP2/MN1/COL6A1/IGFBP5/COL1A1/TEK/TNC/SNAI2/ITGA11/SFRP1/SLC24A3/CHRDL2/CTHRC1/HAND2/LOX/CHRDL1/COMP/COL11A1	35
BP	GO:0010810	regulation of cell-substrate adhesion	26/326	218/18862	9.30751e-15	4.61121e-12	3.33531e-12	COL8A1/ECM2/EFEMP2/FBLN2/SPOCK1/EMILIN1/FERMT2/CCDC80/THY1/GREM1/THBS1/LGALS1/FBLN1/COL1A1/TEK/POSTN/SFRP1/ITGA5/LIMS2/PDPN/EPHA3/FOXF1/COL16A1/FLNA/APOD/CCL21	26
BP	GO:0003012	muscle system process	36/326	453/18862	2.33765e-14	1.01337e-11	7.32977e-12	CALD1/EDNRA/VIM/KCNJ8/ACTA2/SULF1/MYL9/MYLK/CRYAB/IGFBP5/SSPN/RGS4/CNN1/LMOD1/FBXO32/TPM2/CACNA1H/HSPB6/CAV1/KCNMA1/MYH11/ATP2B4/HAND2/TPM1/SORBS1/PLN/SMTN/ACTG2/CASQ2/DES/ATP1A2/FLNA/TMOD1/COMP/TACR2/PI16	36
BP	GO:0006936	muscle contraction	31/326	352/18862	1.07245e-13	4.13251e-11	2.98906e-11	CALD1/EDNRA/VIM/KCNJ8/ACTA2/SULF1/MYL9/MYLK/CRYAB/SSPN/CNN1/LMOD1/TPM2/CACNA1H/HSPB6/CAV1/KCNMA1/MYH11/ATP2B4/TPM1/SORBS1/PLN/SMTN/ACTG2/CASQ2/DES/ATP1A2/FLNA/TMOD1/COMP/TACR2	31
BP	GO:0001501	skeletal system development	35/326	486/18862	9.77975e-13	3.39162e-10	2.45317e-10	CDH11/PRRX1/TGFB3/COL3A1/FBN1/SFRP2/BGN/COL1A2/SFRP4/LUM/GREM1/MGP/COL5A2/VCAN/SULF1/TMEM119/ROR2/EFEMP1/MMP2/RAB23/GPR68/COL1A1/TEK/SNAI2/SFRP1/CHRDL2/COL10A1/TGFBI/PRELP/HAND2/LOX/PDGFRA/FRZB/COMP/COL11A1	35
BP	GO:0007178	transmembrane receptor protein serine/threonine kinase signaling pathway	28/326	358/18862	3.02215e-11	9.52801e-09	6.89166e-09	FSTL1/TGFB3/LRRC32/COL3A1/FBN1/SFRP2/EMILIN1/COL1A2/SFRP4/FERMT2/VIM/GREM1/THBS1/SULF1/HTRA1/TGFB1I1/ROR2/RGMA/DKK3/CILP/SFRP1/CAV1/LOX/FMOD/RBPMS2/CHRDL1/TMEM100/COMP	28
BP	GO:0007517	muscle organ development	26/326	317/18862	5.55015e-11	1.60399e-08	1.16018e-08	COL6A3/EFEMP2/DCN/LAMA2/TAGLN/HEG1/SGCD/HEYL/MYLK/CRYAB/ITGA11/TCF21/ELN/CACNA1H/FHL1/MEOX2/SVIL/CAV1/SGCE/TPM1/LOX/SMTN/POPDC2/JPH2/SMYD1/COL11A1	26
BP	GO:0060537	muscle tissue development	28/326	371/18862	6.96972e-11	1.85931e-08	1.34485e-08	EFEMP2/DCN/PDGFRB/HEG1/SGCD/GREM1/PKD2/HEYL/MYLK/IGFBP5/RGS4/TCF21/ELN/MEOX2/PGM5/SVIL/CAV1/MYH11/TPM1/CSRP1/LOX/PDGFRA/PLN/POPDC2/JPH2/PI16/SMYD1/COL11A1	28
BP	GO:0007160	cell-matrix adhesion	22/326	230/18862	9.27853e-11	2.29843e-08	1.66246e-08	ECM2/COL3A1/EFEMP2/JAM3/EMILIN1/FERMT2/THY1/GREM1/THBS1/FBLN5/TEK/ITGA11/POSTN/SFRP1/EPHA3/SGCE/COL16A1/ITGBL1/SORBS1/EPDR1/APOD/CCL21	22
BP	GO:0060485	mesenchyme development	24/326	287/18862	2.10206e-10	4.85997e-08	3.51524e-08	TGFB3/SFRP2/EDNRA/BNC2/PDGFRB/FERMT2/ACTA2/GREM1/PKD2/TGFB1I1/HEYL/DACT3/COL1A1/SNAI2/SFRP1/TCF21/PDPN/EPHA3/FOXF1/HAND2/ACTG2/FRZB/TMEM100/FLNA	24
BP	GO:0010811	positive regulation of cell-substrate adhesion	16/326	121/18862	3.05325e-10	6.61793e-08	4.78678e-08	COL8A1/ECM2/EFEMP2/FBLN2/EMILIN1/FERMT2/CCDC80/THY1/TEK/SFRP1/ITGA5/LIMS2/FOXF1/COL16A1/FLNA/CCL21	16
BP	GO:2000146	negative regulation of cell motility	26/326	345/18862	3.538e-10	7.21752e-08	5.22046e-08	DPYSL3/COL3A1/SFRP2/DCN/PODN/EMILIN1/SERPINF1/SLIT2/THY1/GREM1/THBS1/RECK/SULF1/CYP1B1/FBLN1/IGFBP5/CXCL12/CLIC4/SFRP1/MEOX2/ATP2B4/TPM1/IL33/CCL2/APOD/CCL21	26
BP	GO:0051271	negative regulation of cellular component movement	26/326	352/18862	5.45452e-10	1.0509e-07	7.60124e-08	DPYSL3/COL3A1/SFRP2/DCN/PODN/EMILIN1/SERPINF1/SLIT2/THY1/GREM1/THBS1/RECK/SULF1/CYP1B1/FBLN1/IGFBP5/CXCL12/CLIC4/SFRP1/MEOX2/ATP2B4/TPM1/IL33/CCL2/APOD/CCL21	26
BP	GO:0030336	negative regulation of cell migration	25/326	330/18862	7.0151e-10	1.28044e-07	9.26149e-08	DPYSL3/COL3A1/SFRP2/DCN/PODN/EMILIN1/SERPINF1/SLIT2/THY1/GREM1/THBS1/RECK/SULF1/CYP1B1/IGFBP5/CXCL12/CLIC4/SFRP1/MEOX2/ATP2B4/TPM1/IL33/CCL2/APOD/CCL21	25
BP	GO:0045765	regulation of angiogenesis	25/326	335/18862	9.58613e-10	1.66223e-07	1.2023e-07	SPARC/SFRP2/DCN/EMILIN1/THBS2/SERPINF1/VEGFC/PRKD1/THBS4/GREM1/THBS1/RECK/SULF1/CYP1B1/PTGIS/RHOJ/TEK/SFRP1/ITGA5/SMOC2/HSPB6/GPNMB/ATP2B4/ADAMTS1/C3	25
BP	GO:1901342	regulation of vasculature development	25/326	341/18862	1.38337e-09	2.28453e-07	1.65241e-07	SPARC/SFRP2/DCN/EMILIN1/THBS2/SERPINF1/VEGFC/PRKD1/THBS4/GREM1/THBS1/RECK/SULF1/CYP1B1/PTGIS/RHOJ/TEK/SFRP1/ITGA5/SMOC2/HSPB6/GPNMB/ATP2B4/ADAMTS1/C3	25
BP	GO:0048771	tissue remodeling	18/326	175/18862	1.52868e-09	2.40975e-07	1.74299e-07	DDR2/TGFB3/BGN/THBS4/GREM1/AXL/TMEM119/MMP2/RSPO3/IGFBP5/SFRP1/CTHRC1/GPNMB/CAV1/HAND2/CSF1R/FLNA/PDK4	18
BP	GO:0061448	connective tissue development	21/326	243/18862	1.61596e-09	2.43658e-07	1.76239e-07	PRRX1/SFRP2/BGN/PDGFRB/LUM/COL5A1/ACTA2/GREM1/MGP/SULF1/ROR2/EFEMP1/COL1A1/SNAI2/CHRDL2/TGFBI/HAND2/LOX/FRZB/COMP/COL11A1	21
BP	GO:0090287	regulation of cellular response to growth factor stimulus	23/326	296/18862	2.11686e-09	3.05887e-07	2.21249e-07	FSTL1/TGFB3/FBN1/SFRP2/DCN/EMILIN1/SFRP4/SLIT2/VEGFC/GREM1/THBS1/SULF1/HTRA1/TGFB1I1/DKK3/SFRP1/ITGA5/SMOC2/CAV1/ATP2B4/LOX/RBPMS2/CHRDL1	23
BP	GO:0040013	negative regulation of locomotion	26/326	377/18862	2.34528e-09	3.25337e-07	2.35318e-07	DPYSL3/COL3A1/SFRP2/DCN/PODN/EMILIN1/SERPINF1/SLIT2/THY1/GREM1/THBS1/RECK/SULF1/CYP1B1/FBLN1/IGFBP5/CXCL12/CLIC4/SFRP1/MEOX2/ATP2B4/TPM1/IL33/CCL2/APOD/CCL21	26
BP	GO:0048251	elastic fiber assembly	6/326	10/18862	5.04432e-09	6.72835e-07	4.86664e-07	EFEMP2/EMILIN1/MFAP4/FBLN5/MYH11/LOX	6
BP	GO:0032963	collagen metabolic process	14/326	109/18862	5.87949e-09	7.55188e-07	5.46231e-07	FAP/TGFB3/PDGFRB/EMILIN1/COL1A2/CTSK/VIM/COL5A1/COL15A1/MMP2/MFAP4/COL1A1/ADAMTS2/MMP11	14
BP	GO:0006939	smooth muscle contraction	13/326	100/18862	1.78397e-08	2.20957e-06	1.59819e-06	EDNRA/ACTA2/SULF1/MYLK/CNN1/CAV1/KCNMA1/MYH11/ATP2B4/SMTN/ATP1A2/COMP/TACR2	13
BP	GO:0002685	regulation of leukocyte migration	18/326	205/18862	1.89294e-08	2.2637e-06	1.63734e-06	JAM3/EMILIN1/SLIT2/VEGFC/THY1/THBS4/GREM1/RARRES2/THBS1/JAM2/CXCL12/CSF1R/IL33/CCL2/APOD/CCL21/CCL19/CCL20	18
BP	GO:0032970	regulation of actin filament-based process	25/326	389/18862	1.97222e-08	2.27988e-06	1.64905e-06	TGFB3/JAM3/PDGFRB/SLIT2/FERMT2/CXCL12/TEK/RGS4/DIXDC1/SFRP1/LMOD1/ELN/SVIL/CAV1/PDPN/EPHA3/TPM1/SYNPO2/PDGFRA/PLN/CSF1R/ATP1A2/FLNA/TMOD1/CCL21	25
BP	GO:0042692	muscle cell differentiation	24/326	362/18862	2.11445e-08	2.36546e-06	1.71095e-06	EFEMP2/PDGFRB/GREM1/TMEM119/BOC/IGFBP5/JAM2/RGS4/LMOD1/CACNA1H/PGM5/FOXF1/MYH11/TPM1/CSRP1/LOX/PDGFRA/FLNC/POPDC2/RBPMS2/TMOD1/COMP/PI16/SMYD1	24
BP	GO:0051216	cartilage development	17/326	185/18862	2.40868e-08	2.61041e-06	1.88812e-06	PRRX1/SFRP2/BGN/LUM/GREM1/MGP/SULF1/ROR2/EFEMP1/COL1A1/SNAI2/CHRDL2/TGFBI/HAND2/FRZB/COMP/COL11A1	17
BP	GO:0030178	negative regulation of Wnt signaling pathway	18/326	212/18862	3.18803e-08	3.35032e-06	2.42331e-06	SFRP2/SFRP4/GREM1/DACT1/ROR2/IGFBP4/DACT3/DKK3/IGFBP6/PRICKLE1/SNAI2/SFRP1/CTHRC1/CAV1/BARX1/NXN/FRZB/SHISA3	18
BP	GO:0071772	response to BMP	16/326	167/18862	3.47205e-08	3.4403e-06	2.48839e-06	FSTL1/TGFB3/FBN1/SFRP2/SFRP4/GREM1/SULF1/HTRA1/ROR2/RGMA/HEYL/SFRP1/RBPMS2/CHRDL1/TMEM100/COMP	16
BP	GO:0071773	cellular response to BMP stimulus	16/326	167/18862	3.47205e-08	3.4403e-06	2.48839e-06	FSTL1/TGFB3/FBN1/SFRP2/SFRP4/GREM1/SULF1/HTRA1/ROR2/RGMA/HEYL/SFRP1/RBPMS2/CHRDL1/TMEM100/COMP	16
BP	GO:0003007	heart morphogenesis	19/326	239/18862	3.80753e-08	3.66792e-06	2.65302e-06	SFRP2/SLIT2/COL5A1/HEG1/PKD2/HEYL/FLRT2/TEK/SNAI2/SLIT3/ELN/FOXF1/HAND2/TPM1/CPE/ADAMTS1/TMEM100/FLNA/COL11A1	19
BP	GO:0002683	negative regulation of immune system process	25/326	403/18862	3.94525e-08	3.69787e-06	2.67469e-06	TGFB3/LRRC32/COL3A1/FBN1/EMILIN1/SLIT2/THY1/GREM1/THBS1/SYT11/AXL/HTRA1/SERPING1/GPR68/CXCL12/MAFB/SFRP1/GPNMB/FOXF1/IL33/CCL2/A2M/FGL2/APOD/CCL21	25
BP	GO:0051146	striated muscle cell differentiation	20/326	269/18862	5.07409e-08	4.62502e-06	3.3453e-06	PDGFRB/GREM1/TMEM119/IGFBP5/JAM2/RGS4/LMOD1/CACNA1H/PGM5/MYH11/TPM1/CSRP1/LOX/PDGFRA/FLNC/POPDC2/TMOD1/COMP/PI16/SMYD1	20
BP	GO:0014706	striated muscle tissue development	23/326	351/18862	5.20115e-08	4.62502e-06	3.3453e-06	DCN/PDGFRB/HEG1/SGCD/GREM1/HEYL/RGS4/TCF21/ELN/MEOX2/PGM5/SVIL/CAV1/MYH11/TPM1/LOX/PDGFRA/PLN/POPDC2/JPH2/PI16/SMYD1/COL11A1	23
BP	GO:0090288	negative regulation of cellular response to growth factor stimulus	13/326	110/18862	5.69813e-08	4.94028e-06	3.57333e-06	FBN1/SFRP2/DCN/EMILIN1/SLIT2/GREM1/THBS1/SULF1/HTRA1/SFRP1/ATP2B4/RBPMS2/CHRDL1	13
BP	GO:0001649	osteoblast differentiation	18/326	223/18862	6.93068e-08	5.86234e-06	4.24026e-06	DDR2/SFRP2/FERMT2/VEGFC/PRKD1/GREM1/VCAN/TMEM119/COL6A1/IGFBP5/COL1A1/TNC/SNAI2/ITGA11/SFRP1/CTHRC1/HAND2/LOX	18
BP	GO:0030509	BMP signaling pathway	15/326	154/18862	7.50362e-08	6.19585e-06	4.48149e-06	FSTL1/TGFB3/FBN1/SFRP2/SFRP4/GREM1/SULF1/HTRA1/ROR2/RGMA/SFRP1/RBPMS2/CHRDL1/TMEM100/COMP	15
BP	GO:0090090	negative regulation of canonical Wnt signaling pathway	16/326	179/18862	9.20207e-08	7.42158e-06	5.36806e-06	SFRP2/SFRP4/GREM1/DACT1/ROR2/IGFBP4/DACT3/DKK3/IGFBP6/PRICKLE1/SNAI2/SFRP1/CTHRC1/CAV1/FRZB/SHISA3	16
BP	GO:0030111	regulation of Wnt signaling pathway	23/326	365/18862	1.05764e-07	8.15086e-06	5.89556e-06	SFRP2/SFRP4/GREM1/DACT1/RECK/SULF1/ROR2/IGFBP4/RSPO3/DACT3/DKK3/IGFBP6/COL1A1/PRICKLE1/SNAI2/DIXDC1/SFRP1/CTHRC1/CAV1/BARX1/NXN/FRZB/SHISA3	23
BP	GO:0090130	tissue migration	23/326	365/18862	1.05764e-07	8.15086e-06	5.89556e-06	SPARC/FAP/FSTL1/DCN/SERPINF1/SLIT2/VEGFC/ACTA2/PRKD1/GREM1/THBS1/CYP1B1/RHOJ/ZEB2/SRPX2/TEK/KANK2/FGF7/SMOC2/MEOX2/FOXF1/ATP2B4/ACTG2	23
BP	GO:0048762	mesenchymal cell differentiation	18/326	231/18862	1.18301e-07	8.88543e-06	6.42688e-06	TGFB3/SFRP2/EDNRA/FERMT2/GREM1/TGFB1I1/HEYL/DACT3/COL1A1/SNAI2/SFRP1/TCF21/PDPN/EPHA3/HAND2/FRZB/TMEM100/FLNA	18
BP	GO:0071559	response to transforming growth factor beta	19/326	257/18862	1.2042e-07	8.88543e-06	6.42688e-06	TGFB3/LRRC32/COL3A1/FBN1/EMILIN1/COL1A2/FERMT2/THBS1/HTRA1/TGFB1I1/DKK3/CILP/COL1A1/POSTN/SFRP1/CAV1/LOX/FMOD/MXRA5	19
BP	GO:0048660	regulation of smooth muscle cell proliferation	15/326	160/18862	1.24621e-07	9.00389e-06	6.51256e-06	TGFB3/EFEMP2/PDGFRB/THBS1/MMP2/IGFBP5/PDE1A/CNN1/OGN/ELN/TPM1/ADAMTS1/RBPMS2/APOD/VIP	15
BP	GO:0048659	smooth muscle cell proliferation	15/326	162/18862	1.46812e-07	1.03907e-05	7.51565e-06	TGFB3/EFEMP2/PDGFRB/THBS1/MMP2/IGFBP5/PDE1A/CNN1/OGN/ELN/TPM1/ADAMTS1/RBPMS2/APOD/VIP	15
BP	GO:0030324	lung development	15/326	163/18862	1.59198e-07	1.1042e-05	7.98673e-06	SPARC/TGFB3/PDGFRB/CRISPLD2/HEG1/IGFBP5/TNC/FGF7/TCF21/PDPN/ADAMTS2/FOXF1/HSD11B1/LOX/PDGFRA	15
BP	GO:0060541	respiratory system development	16/326	188/18862	1.81424e-07	1.23368e-05	8.92327e-06	SPARC/TGFB3/PDGFRB/CRISPLD2/HEG1/IGFBP5/TNC/FGF7/TCF21/PDPN/ALDH1A3/ADAMTS2/FOXF1/HSD11B1/LOX/PDGFRA	16
BP	GO:0030323	respiratory tube development	15/326	167/18862	2.18774e-07	1.45905e-05	1.05534e-05	SPARC/TGFB3/PDGFRB/CRISPLD2/HEG1/IGFBP5/TNC/FGF7/TCF21/PDPN/ADAMTS2/FOXF1/HSD11B1/LOX/PDGFRA	15
BP	GO:0031032	actomyosin structure organization	16/326	191/18862	2.2544e-07	1.47514e-05	1.06698e-05	TGFB3/PDGFRB/FERMT2/FRMD6/CNN1/SFRP1/LMOD1/ELN/PGM5/MYH11/MYH10/TPM1/CSRP1/SORBS1/PDGFRA/TMOD1	16
BP	GO:0150063	visual system development	22/326	363/18862	3.92486e-07	2.52063e-05	1.82318e-05	COL8A1/FBN1/PDGFRB/SERPINF1/COL8A2/VIM/COL5A1/THY1/MFAP5/COL5A2/EFEMP1/CYP1B1/PBX3/RHOJ/CRYAB/CLIC4/ALDH1A3/ATP2B4/PDGFRA/CHRDL1/TMOD1/C3	22
BP	GO:0071560	cellular response to transforming growth factor beta stimulus	18/326	251/18862	4.08057e-07	2.52704e-05	1.82782e-05	TGFB3/LRRC32/COL3A1/FBN1/EMILIN1/COL1A2/FERMT2/THBS1/HTRA1/TGFB1I1/DKK3/CILP/COL1A1/POSTN/SFRP1/CAV1/LOX/FMOD	18
BP	GO:0090092	regulation of transmembrane receptor protein serine/threonine kinase signaling pathway	18/326	251/18862	4.08057e-07	2.52704e-05	1.82782e-05	FSTL1/TGFB3/FBN1/SFRP2/EMILIN1/SFRP4/GREM1/THBS1/SULF1/HTRA1/TGFB1I1/DKK3/CILP/SFRP1/CAV1/LOX/RBPMS2/CHRDL1	18
BP	GO:0045785	positive regulation of cell adhesion	24/326	425/18862	4.1817e-07	2.54424e-05	1.84026e-05	COL8A1/ECM2/EFEMP2/FBLN2/SFRP2/EMILIN1/FERMT2/CCDC80/THY1/LGALS1/CXCL12/TEK/SFRP1/ITGA5/LIMS2/CAV1/PDPN/FOXF1/TPM1/COL16A1/CCL2/FLNA/CCL21/CCL19	24
BP	GO:0033627	cell adhesion mediated by integrin	10/326	72/18862	4.30294e-07	2.57286e-05	1.86096e-05	FBN1/SFRP2/JAM3/CYP1B1/SNAI2/ITGA11/ITGA5/COL16A1/ITGBL1/CCL21	10
BP	GO:0001837	epithelial to mesenchymal transition	14/326	153/18862	4.43422e-07	2.60642e-05	1.88523e-05	TGFB3/SFRP2/FERMT2/GREM1/TGFB1I1/HEYL/DACT3/COL1A1/SNAI2/SFRP1/PDPN/EPHA3/TMEM100/FLNA	14
BP	GO:0044273	sulfur compound catabolic process	9/326	56/18862	4.57214e-07	2.6427e-05	1.91148e-05	DCN/BGN/LUM/OMD/GGT5/VCAN/OGN/PRELP/FMOD	9
BP	GO:0050673	epithelial cell proliferation	24/326	428/18862	4.74644e-07	2.69847e-05	1.95181e-05	SPARC/COL8A1/FAP/SFRP2/SERPINF1/COL8A2/VEGFC/PRKD1/THBS4/THBS1/SULF1/HTRA1/IGFBP4/IGFBP5/CXCL12/TEK/SNAI2/FGF7/SFRP1/LIMS2/CAV1/KLF9/CCL2/VIP	24
BP	GO:0048880	sensory system development	22/326	369/18862	5.18118e-07	2.89812e-05	2.09622e-05	COL8A1/FBN1/PDGFRB/SERPINF1/COL8A2/VIM/COL5A1/THY1/MFAP5/COL5A2/EFEMP1/CYP1B1/PBX3/RHOJ/CRYAB/CLIC4/ALDH1A3/ATP2B4/PDGFRA/CHRDL1/TMOD1/C3	22
BP	GO:0071295	cellular response to vitamin	7/326	30/18862	6.24901e-07	3.43993e-05	2.48812e-05	MN1/COL1A1/TNC/KANK2/SNAI2/POSTN/SFRP1	7
BP	GO:0060828	regulation of canonical Wnt signaling pathway	19/326	287/18862	6.60753e-07	3.58045e-05	2.58976e-05	SFRP2/SFRP4/GREM1/DACT1/RECK/ROR2/IGFBP4/RSPO3/DACT3/DKK3/IGFBP6/COL1A1/PRICKLE1/SNAI2/SFRP1/CTHRC1/CAV1/FRZB/SHISA3	19
BP	GO:0003206	cardiac chamber morphogenesis	12/326	115/18862	7.291e-07	3.89003e-05	2.81368e-05	SFRP2/SLIT2/HEG1/HEYL/TEK/SLIT3/FOXF1/HAND2/TPM1/CPE/ADAMTS1/COL11A1	12
BP	GO:0035987	endodermal cell differentiation	8/326	44/18862	7.53494e-07	3.95927e-05	2.86376e-05	COL8A1/COL5A1/COL5A2/MMP2/COL6A1/COL12A1/ITGA5/COL11A1	8
BP	GO:0085029	extracellular matrix assembly	8/326	45/18862	9.02748e-07	4.67273e-05	3.37981e-05	EFEMP2/ANTXR1/EMILIN1/COL1A2/MFAP4/FBLN5/MYH11/LOX	8
BP	GO:0032956	regulation of actin cytoskeleton organization	21/326	352/18862	9.34979e-07	4.76839e-05	3.449e-05	TGFB3/JAM3/PDGFRB/SLIT2/FERMT2/CXCL12/TEK/RGS4/DIXDC1/SFRP1/LMOD1/ELN/SVIL/EPHA3/TPM1/SYNPO2/PDGFRA/CSF1R/FLNA/TMOD1/CCL21	21
BP	GO:0048705	skeletal system morphogenesis	16/326	213/18862	9.80897e-07	4.93007e-05	3.56595e-05	PRRX1/TGFB3/SFRP2/SFRP4/GREM1/MGP/TMEM119/ROR2/MMP2/RAB23/COL1A1/TEK/SFRP1/PDGFRA/COMP/COL11A1	16
BP	GO:0002688	regulation of leukocyte chemotaxis	12/326	119/18862	1.05483e-06	5.18518e-05	3.75047e-05	JAM3/SLIT2/VEGFC/THBS4/GREM1/RARRES2/THBS1/CXCL12/CSF1R/CCL2/CCL21/CCL19	12
BP	GO:0042340	keratan sulfate catabolic process	5/326	12/18862	1.07235e-06	5.18518e-05	3.75047e-05	LUM/OMD/OGN/PRELP/FMOD	5
BP	GO:0002686	negative regulation of leukocyte migration	8/326	46/18862	1.07651e-06	5.18518e-05	3.75047e-05	EMILIN1/SLIT2/GREM1/CXCL12/IL33/CCL2/APOD/CCL21	8
BP	GO:0070252	actin-mediated cell contraction	12/326	120/18862	1.15412e-06	5.48288e-05	3.96579e-05	VIM/KCNJ8/TPM2/CAV1/PDPN/TPM1/PLN/DES/ATP1A2/FLNA/TMOD1/EPDR1	12
BP	GO:0007044	cell-substrate junction assembly	11/326	100/18862	1.25149e-06	5.86508e-05	4.24224e-05	FERMT2/THY1/GREM1/THBS1/TEK/SFRP1/ITGA5/EPHA3/COL16A1/SORBS1/APOD	11
BP	GO:0001654	eye development	21/326	359/18862	1.28281e-06	5.93173e-05	4.29045e-05	COL8A1/FBN1/PDGFRB/SERPINF1/COL8A2/VIM/COL5A1/THY1/MFAP5/COL5A2/EFEMP1/CYP1B1/PBX3/RHOJ/CRYAB/CLIC4/ALDH1A3/ATP2B4/PDGFRA/CHRDL1/TMOD1	21
BP	GO:0022617	extracellular matrix disassembly	10/326	81/18862	1.31389e-06	5.99548e-05	4.33656e-05	TIMP2/DDR2/FAP/CTSK/HTRA1/MMP2/PDPN/A2M/CTSG/MMP11	10
BP	GO:0055001	muscle cell development	14/326	168/18862	1.37705e-06	6.2021e-05	4.48601e-05	EFEMP2/PDGFRB/RGS4/LMOD1/PGM5/MYH11/TPM1/CSRP1/LOX/PDGFRA/FLNC/TMOD1/COMP/PI16	14
BP	GO:1901654	response to ketone	15/326	193/18862	1.39995e-06	6.2244e-05	4.50214e-05	TGFB3/IGFBP7/SERPINF1/SLIT2/THBS1/FIBIN/TNC/SFRP1/SLIT3/FBXO32/CAV1/KLF9/PLN/CCL21/CCL19	15
BP	GO:0051893	regulation of focal adhesion assembly	9/326	64/18862	1.47228e-06	6.38235e-05	4.61639e-05	FERMT2/THY1/GREM1/THBS1/TEK/SFRP1/EPHA3/COL16A1/APOD	9
BP	GO:0090109	regulation of cell-substrate junction assembly	9/326	64/18862	1.47228e-06	6.38235e-05	4.61639e-05	FERMT2/THY1/GREM1/THBS1/TEK/SFRP1/EPHA3/COL16A1/APOD	9
BP	GO:0060343	trabecula formation	6/326	22/18862	1.50393e-06	6.42498e-05	4.64722e-05	GREM1/MMP2/COL1A1/TEK/SFRP1/ADAMTS1	6
BP	GO:0034329	cell junction assembly	23/326	425/18862	1.5193e-06	6.42498e-05	4.64722e-05	CDH11/JAM3/FERMT2/HEG1/THY1/GREM1/THBS1/FLRT2/SRPX2/TEK/SNAI2/CNTNAP1/SFRP1/ITGA5/MAP1B/LIMS2/CAV1/EPHA3/COL16A1/SORBS1/FLNC/FLNA/APOD	23
BP	GO:0060070	canonical Wnt signaling pathway	20/326	333/18862	1.5377e-06	6.42498e-05	4.64722e-05	SFRP2/SFRP4/GREM1/DACT1/RECK/ROR2/IGFBP4/RSPO3/DACT3/DKK3/IGFBP6/COL1A1/PRICKLE1/SNAI2/DIXDC1/SFRP1/CTHRC1/CAV1/FRZB/SHISA3	20
BP	GO:0055002	striated muscle cell development	11/326	103/18862	1.68319e-06	6.94917e-05	5.02637e-05	PDGFRB/LMOD1/PGM5/MYH11/TPM1/CSRP1/LOX/PDGFRA/FLNC/TMOD1/COMP	11
BP	GO:0060326	cell chemotaxis	19/326	306/18862	1.72588e-06	7.04158e-05	5.09321e-05	JAM3/PDGFRB/SLIT2/VEGFC/PRKD1/THBS4/GREM1/RARRES2/THBS1/CXCL12/SMOC2/LOX/PDGFRA/CH25H/CSF1R/CCL2/CCL21/CCL19/CCL20	19
BP	GO:0071622	regulation of granulocyte chemotaxis	8/326	49/18862	1.77861e-06	7.11728e-05	5.14796e-05	JAM3/SLIT2/THBS4/RARRES2/THBS1/CSF1R/CCL21/CCL19	8
BP	GO:0001952	regulation of cell-matrix adhesion	12/326	125/18862	1.78548e-06	7.11728e-05	5.14796e-05	EFEMP2/FERMT2/THY1/GREM1/THBS1/TEK/POSTN/SFRP1/EPHA3/COL16A1/APOD/CCL21	12
BP	GO:0050920	regulation of chemotaxis	16/326	224/18862	1.90474e-06	7.50642e-05	5.42943e-05	JAM3/PDGFRB/SLIT2/VEGFC/PRKD1/THBS4/GREM1/RARRES2/THBS1/CXCL12/SMOC2/PDGFRA/CSF1R/CCL2/CCL21/CCL19	16
BP	GO:0048041	focal adhesion assembly	10/326	85/18862	2.05923e-06	7.98899e-05	5.77847e-05	FERMT2/THY1/GREM1/THBS1/TEK/SFRP1/EPHA3/COL16A1/SORBS1/APOD	10
BP	GO:1902903	regulation of supramolecular fiber organization	21/326	370/18862	2.07327e-06	7.98899e-05	5.77847e-05	TGFB3/EFEMP2/EMILIN1/SLIT2/FERMT2/AEBP1/CLIP3/MAP1A/CRYAB/CXCL12/RGS4/SFRP1/MAP1B/LMOD1/ELN/SVIL/TPM1/SYNPO2/FLNA/TMOD1/CCL21	21
BP	GO:0030048	actin filament-based movement	13/326	150/18862	2.11896e-06	8.07532e-05	5.84092e-05	VIM/KCNJ8/TPM2/CAV1/PDPN/MYH10/TPM1/PLN/DES/ATP1A2/FLNA/TMOD1/EPDR1	13
BP	GO:0007229	integrin-mediated signaling pathway	11/326	106/18862	2.24054e-06	8.35503e-05	6.04323e-05	COL3A1/FERMT2/THY1/PRKD1/ITGA11/ITGA5/LIMS2/COL16A1/ITGBL1/ADAMTS1/FLNA	11
BP	GO:0150115	cell-substrate junction organization	11/326	106/18862	2.24054e-06	8.35503e-05	6.04323e-05	FERMT2/THY1/GREM1/THBS1/TEK/SFRP1/ITGA5/EPHA3/COL16A1/SORBS1/APOD	11
BP	GO:0002576	platelet degranulation	12/326	128/18862	2.29625e-06	8.38251e-05	6.06311e-05	SPARC/TIMP3/TGFB3/VEGFC/ISLR/RARRES2/THBS1/SERPING1/F13A1/A2M/FLNA/CFD	12
BP	GO:0045667	regulation of osteoblast differentiation	12/326	128/18862	2.29625e-06	8.38251e-05	6.06311e-05	DDR2/SFRP2/FERMT2/VEGFC/PRKD1/GREM1/TMEM119/IGFBP5/SNAI2/SFRP1/CTHRC1/HAND2	12
BP	GO:0001667	ameboidal-type cell migration	24/326	473/18862	2.75826e-06	9.9642e-05	7.20715e-05	SPARC/DDR2/FAP/FSTL1/DCN/SERPINF1/SYDE1/SLIT2/VEGFC/PRKD1/GREM1/THBS1/CYP1B1/RHOJ/ZEB2/SRPX2/TEK/KANK2/FGF7/SMOC2/MEOX2/ATP2B4/HAND2/AKAP12	24
BP	GO:0150116	regulation of cell-substrate junction organization	9/326	69/18862	2.80867e-06	0.000100417	7.26324e-05	FERMT2/THY1/GREM1/THBS1/TEK/SFRP1/EPHA3/COL16A1/APOD	9
BP	GO:0072001	renal system development	18/326	288/18862	2.95601e-06	0.000104607	7.56624e-05	FBN1/DCN/PDGFRB/SERPINF1/SLIT2/KCNJ8/ACTA2/GREM1/PKD2/SULF1/HEYL/TEK/KANK2/SFRP1/TCF21/FOXF1/PDGFRA/ADAMTS1	18
BP	GO:0001706	endoderm formation	8/326	53/18862	3.29191e-06	0.000115317	8.34091e-05	COL8A1/COL5A1/COL5A2/MMP2/COL6A1/COL12A1/ITGA5/COL11A1	8
BP	GO:0001655	urogenital system development	19/326	320/18862	3.32936e-06	0.000115462	8.35144e-05	FBN1/DCN/PDGFRB/SERPINF1/SLIT2/KCNJ8/ACTA2/GREM1/PKD2/SULF1/HEYL/TEK/TNC/KANK2/SFRP1/TCF21/FOXF1/PDGFRA/ADAMTS1	19
BP	GO:0002687	positive regulation of leukocyte migration	12/326	133/18862	3.43752e-06	0.000118033	8.53737e-05	JAM3/VEGFC/THY1/THBS4/RARRES2/THBS1/JAM2/CXCL12/CSF1R/CCL21/CCL19/CCL20	12
BP	GO:0071675	regulation of mononuclear cell migration	11/326	111/18862	3.53278e-06	0.000120115	8.68794e-05	SLIT2/GREM1/RARRES2/THBS1/JAM2/CXCL12/CSF1R/CCL2/APOD/CCL21/CCL20	11
BP	GO:0090101	negative regulation of transmembrane receptor protein serine/threonine kinase signaling pathway	12/326	134/18862	3.71798e-06	0.000125184	9.05462e-05	TGFB3/FBN1/SFRP2/EMILIN1/GREM1/HTRA1/TGFB1I1/CILP/SFRP1/CAV1/RBPMS2/CHRDL1	12
BP	GO:0030510	regulation of BMP signaling pathway	10/326	91/18862	3.85972e-06	0.000128707	9.30941e-05	FSTL1/FBN1/SFRP2/SFRP4/GREM1/SULF1/HTRA1/SFRP1/RBPMS2/CHRDL1	10
BP	GO:0007162	negative regulation of cell adhesion	18/326	295/18862	4.13775e-06	0.000136664	9.88498e-05	LRRC32/SPOCK1/JAM3/THBS1/LGALS1/CYP1B1/FBLN1/COL1A1/CXCL12/TNC/SNAI2/POSTN/TGFBI/GPNMB/SERPINE2/FGL2/APOD/CCL21	18
BP	GO:0030282	bone mineralization	11/326	113/18862	4.20904e-06	0.000137707	9.96043e-05	DDR2/TGFB3/COL1A2/OMD/GREM1/MGP/TMEM119/ROR2/SLC24A3/LOX/COMP	11
BP	GO:0031214	biomineral tissue development	13/326	160/18862	4.34863e-06	0.000139281	0.000100743	DDR2/TGFB3/COL1A2/OMD/GREM1/MGP/TMEM119/ROR2/COL1A1/FAM20C/SLC24A3/LOX/COMP	13
BP	GO:0061437	renal system vasculature development	6/326	26/18862	4.37763e-06	0.000139281	0.000100743	PDGFRB/ACTA2/PKD2/TEK/TCF21/PDGFRA	6
BP	GO:0061440	kidney vasculature development	6/326	26/18862	4.37763e-06	0.000139281	0.000100743	PDGFRB/ACTA2/PKD2/TEK/TCF21/PDGFRA	6
BP	GO:0010631	epithelial cell migration	20/326	357/18862	4.42556e-06	0.000139526	0.00010092	SPARC/FAP/FSTL1/DCN/SERPINF1/SLIT2/VEGFC/PRKD1/GREM1/THBS1/CYP1B1/RHOJ/ZEB2/SRPX2/TEK/KANK2/FGF7/SMOC2/MEOX2/ATP2B4	20
BP	GO:0110148	biomineralization	13/326	162/18862	4.98697e-06	0.000155303	0.000112331	DDR2/TGFB3/COL1A2/OMD/GREM1/MGP/TMEM119/ROR2/COL1A1/FAM20C/SLC24A3/LOX/COMP	13
BP	GO:0090132	epithelium migration	20/326	360/18862	5.01554e-06	0.000155303	0.000112331	SPARC/FAP/FSTL1/DCN/SERPINF1/SLIT2/VEGFC/PRKD1/GREM1/THBS1/CYP1B1/RHOJ/ZEB2/SRPX2/TEK/KANK2/FGF7/SMOC2/MEOX2/ATP2B4	20
BP	GO:0050921	positive regulation of chemotaxis	12/326	139/18862	5.44472e-06	0.000165772	0.000119903	PDGFRB/SLIT2/VEGFC/PRKD1/THBS4/RARRES2/THBS1/CXCL12/SMOC2/CSF1R/CCL21/CCL19	12
BP	GO:0090257	regulation of muscle system process	16/326	243/18862	5.44924e-06	0.000165772	0.000119903	MYL9/IGFBP5/RGS4/CNN1/FBXO32/HSPB6/CAV1/KCNMA1/ATP2B4/HAND2/TPM1/PLN/CASQ2/ATP1A2/TACR2/PI16	16
BP	GO:0060840	artery development	10/326	95/18862	5.70979e-06	0.000172187	0.000124544	PRRX1/EFEMP2/PDGFRB/PKD2/MYLK/PRICKLE1/FOXF1/HAND2/LOX/COMP	10
BP	GO:0097529	myeloid leukocyte migration	15/326	218/18862	6.30315e-06	0.000188442	0.000136301	JAM3/EMILIN1/SLIT2/VEGFC/THBS4/GREM1/RARRES2/THBS1/ROR2/CXCL12/CSF1R/CCL2/CCL21/CCL19/CCL20	15
BP	GO:0031102	neuron projection regeneration	8/326	58/18862	6.60497e-06	0.000195778	0.000141607	PRRX1/JAM3/THY1/RGMA/TNC/MAP1B/FLNA/APOD	8
BP	GO:0031670	cellular response to nutrient	7/326	42/18862	6.93126e-06	0.000203709	0.000147343	MN1/COL1A1/TNC/KANK2/SNAI2/POSTN/SFRP1	7
BP	GO:0060348	bone development	14/326	193/18862	7.02097e-06	0.000204611	0.000147996	TGFB3/FBN1/SFRP2/BGN/SFRP4/GREM1/SULF1/TMEM119/RAB23/GPR68/COL1A1/TEK/LOX/COMP	14
BP	GO:0048562	embryonic organ morphogenesis	17/326	277/18862	7.09962e-06	0.000205179	0.000148407	PRRX1/TGFB3/FBN1/MFAP5/PKD2/ROR2/EFEMP1/MAFB/TCF21/CTHRC1/ALDH1A3/FOXF1/HAND2/PDGFRA/FRZB/RBPMS2/COL11A1	17
BP	GO:0043542	endothelial cell migration	17/326	278/18862	7.44529e-06	0.000213391	0.000154347	SPARC/FAP/FSTL1/DCN/SERPINF1/SLIT2/VEGFC/PRKD1/GREM1/THBS1/CYP1B1/RHOJ/SRPX2/TEK/SMOC2/MEOX2/ATP2B4	17
BP	GO:0030239	myofibril assembly	8/326	59/18862	7.52737e-06	0.000213975	0.000154769	PDGFRB/LMOD1/PGM5/MYH11/TPM1/CSRP1/PDGFRA/TMOD1	8
BP	GO:0033002	muscle cell proliferation	15/326	222/18862	7.85246e-06	0.000221401	0.00016014	TGFB3/EFEMP2/PDGFRB/THBS1/MMP2/IGFBP5/PDE1A/CNN1/OGN/ELN/TPM1/ADAMTS1/RBPMS2/APOD/VIP	15
BP	GO:0061383	trabecula morphogenesis	7/326	43/18862	8.15732e-06	0.000227008	0.000164196	HEG1/GREM1/MMP2/COL1A1/TEK/SFRP1/ADAMTS1	7
BP	GO:0001822	kidney development	17/326	280/18862	8.18223e-06	0.000227008	0.000164196	FBN1/DCN/PDGFRB/SERPINF1/SLIT2/KCNJ8/ACTA2/GREM1/PKD2/SULF1/HEYL/TEK/KANK2/SFRP1/TCF21/PDGFRA/ADAMTS1	17
BP	GO:0010717	regulation of epithelial to mesenchymal transition	10/326	100/18862	9.06408e-06	0.000247514	0.000179028	TGFB3/SFRP2/FERMT2/GREM1/TGFB1I1/DACT3/COL1A1/SFRP1/PDPN/EPHA3	10
BP	GO:0010927	cellular component assembly involved in morphogenesis	10/326	100/18862	9.06408e-06	0.000247514	0.000179028	PDGFRB/PMP22/CNTNAP1/LMOD1/PGM5/MYH11/TPM1/CSRP1/PDGFRA/TMOD1	10
BP	GO:0048546	digestive tract morphogenesis	7/326	44/18862	9.55805e-06	0.000258963	0.000187309	SFRP2/DACT1/SFRP1/TCF21/FOXF1/PDGFRA/RBPMS2	7
BP	GO:0061138	morphogenesis of a branching epithelium	13/326	173/18862	1.02099e-05	0.00027448	0.000198532	SFRP2/EDNRA/SLIT2/GREM1/PKD2/SULF1/RSPO3/TNC/CLIC4/FGF7/SFRP1/TCF21/FOXF1	13
BP	GO:0061298	retina vasculature development in camera-type eye	5/326	18/18862	1.0651e-05	0.000284137	0.000205518	PDGFRB/CYP1B1/RHOJ/CLIC4/PDGFRA	5
BP	GO:0006027	glycosaminoglycan catabolic process	8/326	62/18862	1.09729e-05	0.00029049	0.000210113	DCN/BGN/LUM/OMD/VCAN/OGN/PRELP/FMOD	8
BP	GO:0007179	transforming growth factor beta receptor signaling pathway	14/326	202/18862	1.18197e-05	0.000310536	0.000224612	TGFB3/LRRC32/COL3A1/FBN1/EMILIN1/COL1A2/FERMT2/THBS1/HTRA1/TGFB1I1/DKK3/CAV1/LOX/FMOD	14
BP	GO:0048662	negative regulation of smooth muscle cell proliferation	8/326	63/18862	1.23822e-05	0.000322867	0.000233531	TGFB3/EFEMP2/IGFBP5/CNN1/OGN/TPM1/APOD/VIP	8
BP	GO:0003205	cardiac chamber development	12/326	151/18862	1.27264e-05	0.000329366	0.000238232	SFRP2/SLIT2/HEG1/HEYL/TEK/SLIT3/FOXF1/HAND2/TPM1/CPE/ADAMTS1/COL11A1	12
BP	GO:0003180	aortic valve morphogenesis	6/326	31/18862	1.30165e-05	0.000334379	0.000241858	EMILIN1/SLIT2/HEYL/SNAI2/SLIT3/ELN	6
BP	GO:1903053	regulation of extracellular matrix organization	7/326	47/18862	1.50055e-05	0.000382639	0.000276765	DDR2/FAP/EFEMP2/ANTXR1/EMILIN1/AEBP1/PDPN	7
BP	GO:0034103	regulation of tissue remodeling	9/326	86/18862	1.76242e-05	0.000446136	0.000322692	DDR2/THBS4/GREM1/TMEM119/SFRP1/GPNMB/HAND2/CSF1R/PDK4	9
BP	GO:0043552	positive regulation of phosphatidylinositol 3-kinase activity	6/326	33/18862	1.90187e-05	0.000476793	0.000344866	PDGFRB/PRKD1/TEK/PDGFRA/CCL21/CCL19	6
BP	GO:0048545	response to steroid hormone	18/326	330/18862	1.91102e-05	0.000476793	0.000344866	SPARC/TGFB3/IGFBP7/SERPINF1/SLIT2/THBS1/HEYL/FIBIN/COL1A1/KANK2/SFRP1/SLIT3/FBXO32/TCF21/CAV1/KLF9/LOX/ATP1A2	18
BP	GO:0030308	negative regulation of cell growth	13/326	185/18862	2.09228e-05	0.000518288	0.00037488	SFRP2/SLIT2/GREM1/DACT3/CRYAB/RGS4/SFRP1/SLIT3/RERG/FHL1/FRZB/SERPINE2/PI16	13
BP	GO:0006026	aminoglycan catabolic process	8/326	68/18862	2.1929e-05	0.000539359	0.000390121	DCN/BGN/LUM/OMD/VCAN/OGN/PRELP/FMOD	8
BP	GO:0001763	morphogenesis of a branching structure	13/326	186/18862	2.2151e-05	0.000540983	0.000391296	SFRP2/EDNRA/SLIT2/GREM1/PKD2/SULF1/RSPO3/TNC/CLIC4/FGF7/SFRP1/TCF21/FOXF1	13
BP	GO:0033273	response to vitamin	9/326	89/18862	2.32817e-05	0.000564621	0.000408393	SPARC/MN1/COL1A1/TNC/KANK2/SNAI2/POSTN/SFRP1/MAP1B	9
BP	GO:0090596	sensory organ morphogenesis	15/326	244/18862	2.40872e-05	0.0005801	0.000419589	COL8A1/PRRX1/FBN1/COL8A2/COL5A1/THY1/MFAP5/COL5A2/ROR2/EFEMP1/MAFB/CTHRC1/ALDH1A3/FRZB/COL11A1	15
BP	GO:0003208	cardiac ventricle morphogenesis	8/326	69/18862	2.44365e-05	0.000580451	0.000419843	SFRP2/HEG1/HEYL/FOXF1/HAND2/TPM1/CPE/COL11A1	8
BP	GO:0071229	cellular response to acid chemical	8/326	69/18862	2.44365e-05	0.000580451	0.000419843	COL1A2/COL5A2/PKD2/MMP2/COL6A1/COL1A1/COL16A1/PDGFRA	8
BP	GO:0030514	negative regulation of BMP signaling pathway	7/326	51/18862	2.60367e-05	0.000607284	0.000439251	FBN1/SFRP2/GREM1/HTRA1/SFRP1/RBPMS2/CHRDL1	7
BP	GO:0002604	regulation of dendritic cell antigen processing and presentation	4/326	11/18862	2.62666e-05	0.000607284	0.000439251	THBS1/FGL2/CCL21/CCL19	4
BP	GO:0097048	dendritic cell apoptotic process	4/326	11/18862	2.62666e-05	0.000607284	0.000439251	AXL/CXCL12/CCL21/CCL19	4
BP	GO:2000668	regulation of dendritic cell apoptotic process	4/326	11/18862	2.62666e-05	0.000607284	0.000439251	AXL/CXCL12/CCL21/CCL19	4
BP	GO:0018149	peptide cross-linking	6/326	35/18862	2.70733e-05	0.00061608	0.000445614	COL3A1/DCN/BGN/THBS1/F13A1/PI3	6
BP	GO:0051051	negative regulation of transport	21/326	438/18862	2.7158e-05	0.00061608	0.000445614	SFRP4/PRKD1/THBS1/SYT11/PKD2/GEM/CRYAB/RAB23/RGS4/SFRP1/MAP1B/CAV1/EPHA3/FOXF1/PLN/CASQ2/SERPINE2/ATP1A2/TACR2/APOD/VIP	21
BP	GO:0048844	artery morphogenesis	8/326	70/18862	2.718e-05	0.00061608	0.000445614	PRRX1/EFEMP2/PDGFRB/PKD2/MYLK/FOXF1/HAND2/COMP	8
BP	GO:0071674	mononuclear cell migration	13/326	190/18862	2.77181e-05	0.000623105	0.000450695	SLIT2/GREM1/RARRES2/THBS1/JAM2/CXCL12/CH25H/CSF1R/CCL2/APOD/CCL21/CCL19/CCL20	13
BP	GO:0048608	reproductive structure development	20/326	405/18862	2.78493e-05	0.000623105	0.000450695	SFRP2/DCN/PDGFRB/SERPINF1/SLIT2/PKD2/AXL/SULF1/HTRA1/ROR2/RSPO3/TNC/SFRP1/SLIT3/TCF21/PDGFRA/ADAMTS1/SERPINE2/FLNA/C3	20
BP	GO:0003231	cardiac ventricle development	10/326	114/18862	2.88014e-05	0.000640277	0.000463116	SFRP2/SLIT2/HEG1/HEYL/SLIT3/FOXF1/HAND2/TPM1/CPE/COL11A1	10
BP	GO:0050678	regulation of epithelial cell proliferation	19/326	374/18862	3.00736e-05	0.000664302	0.000480493	SPARC/SFRP2/SERPINF1/VEGFC/PRKD1/THBS4/THBS1/SULF1/HTRA1/CXCL12/TEK/SNAI2/FGF7/SFRP1/LIMS2/CAV1/KLF9/CCL2/VIP	19
BP	GO:0007596	blood coagulation	18/326	342/18862	3.06668e-05	0.000669229	0.000484057	FAP/COL3A1/COL1A2/THBS1/AXL/MYL9/FBLN1/SERPING1/COL1A1/CAV1/PDPN/CSRP1/F13A1/PDGFRA/SERPINE2/A2M/FLNA/COMP	18
BP	GO:0061458	reproductive system development	20/326	408/18862	3.09131e-05	0.000669229	0.000484057	SFRP2/DCN/PDGFRB/SERPINF1/SLIT2/PKD2/AXL/SULF1/HTRA1/ROR2/RSPO3/TNC/SFRP1/SLIT3/TCF21/PDGFRA/ADAMTS1/SERPINE2/FLNA/C3	20
BP	GO:0071305	cellular response to vitamin D	5/326	22/18862	3.09276e-05	0.000669229	0.000484057	MN1/TNC/KANK2/SNAI2/SFRP1	5
BP	GO:0001704	formation of primary germ layer	10/326	115/18862	3.10686e-05	0.000669229	0.000484057	COL8A1/SFRP2/COL5A1/COL5A2/MMP2/COL6A1/COL12A1/ITGA5/FOXF1/COL11A1	10
BP	GO:0003176	aortic valve development	6/326	36/18862	3.20191e-05	0.000685447	0.000495787	EMILIN1/SLIT2/HEYL/SNAI2/SLIT3/ELN	6
BP	GO:0035924	cellular response to vascular endothelial growth factor stimulus	8/326	72/18862	3.34449e-05	0.000711577	0.000514687	GAS1/DCN/PDGFRB/VEGFC/PRKD1/SMOC2/ATP2B4/PDGFRA	8
BP	GO:0048568	embryonic organ development	20/326	412/18862	3.54665e-05	0.000749987	0.000542469	PRRX1/TGFB3/FBN1/MFAP5/RARRES2/PKD2/ROR2/EFEMP1/PBX3/RSPO3/MAFB/TCF21/CTHRC1/ALDH1A3/FOXF1/HAND2/PDGFRA/FRZB/RBPMS2/COL11A1	20
BP	GO:0007599	hemostasis	18/326	346/18862	3.57153e-05	0.000750671	0.000542964	FAP/COL3A1/COL1A2/THBS1/AXL/MYL9/FBLN1/SERPING1/COL1A1/CAV1/PDPN/CSRP1/F13A1/PDGFRA/SERPINE2/A2M/FLNA/COMP	18
BP	GO:1901888	regulation of cell junction assembly	13/326	195/18862	3.637e-05	0.000759827	0.000549587	FERMT2/THY1/GREM1/THBS1/FLRT2/SRPX2/TEK/SNAI2/SFRP1/CAV1/EPHA3/COL16A1/APOD	13
BP	GO:0048732	gland development	20/326	413/18862	3.66947e-05	0.000762019	0.000551172	TGFB3/SERPINF1/PKD2/SULF1/IGFBP5/DKK3/TNC/MAFB/FGF7/SFRP1/TCF21/LIMS2/CAV1/ALDH1A3/FOXF1/HAND2/PDGFRA/CSF1R/FRZB/SERPINE2	20
BP	GO:0050817	coagulation	18/326	347/18862	3.70876e-05	0.000765594	0.000553758	FAP/COL3A1/COL1A2/THBS1/AXL/MYL9/FBLN1/SERPING1/COL1A1/CAV1/PDPN/CSRP1/F13A1/PDGFRA/SERPINE2/A2M/FLNA/COMP	18
BP	GO:0090218	positive regulation of lipid kinase activity	6/326	37/18862	3.76651e-05	0.000772914	0.000559053	PDGFRB/PRKD1/TEK/PDGFRA/CCL21/CCL19	6
BP	GO:0001954	positive regulation of cell-matrix adhesion	7/326	54/18862	3.81014e-05	0.000777269	0.000562203	EFEMP2/FERMT2/THY1/TEK/SFRP1/COL16A1/CCL21	7
BP	GO:0061430	bone trabecula morphogenesis	4/326	12/18862	3.88637e-05	0.000788184	0.000570097	GREM1/MMP2/COL1A1/SFRP1	4
BP	GO:0030595	leukocyte chemotaxis	14/326	226/18862	4.12851e-05	0.000832423	0.000602096	JAM3/SLIT2/VEGFC/THBS4/GREM1/RARRES2/THBS1/CXCL12/CH25H/CSF1R/CCL2/CCL21/CCL19/CCL20	14
BP	GO:0010466	negative regulation of peptidase activity	15/326	257/18862	4.38862e-05	0.000879754	0.00063633	TIMP2/TIMP3/COL6A3/SFRP2/SPOCK1/SERPINF1/THBS1/RECK/SERPING1/CRYAB/SERPINE2/A2M/PI16/C3/PI3	15
BP	GO:0016525	negative regulation of angiogenesis	11/326	146/18862	4.78138e-05	0.000952978	0.000689293	SPARC/DCN/EMILIN1/THBS2/SERPINF1/THBS4/THBS1/SULF1/TEK/ATP2B4/ADAMTS1	11
BP	GO:0007492	endoderm development	8/326	76/18862	4.96311e-05	0.000983547	0.000711404	COL8A1/COL5A1/COL5A2/MMP2/COL6A1/COL12A1/ITGA5/COL11A1	8
BP	GO:2000181	negative regulation of blood vessel morphogenesis	11/326	148/18862	5.41513e-05	0.00106652	0.000771422	SPARC/DCN/EMILIN1/THBS2/SERPINF1/THBS4/THBS1/SULF1/TEK/ATP2B4/ADAMTS1	11
BP	GO:0048678	response to axon injury	8/326	77/18862	5.45642e-05	0.00106652	0.000771422	DPYSL3/JAM3/LGALS1/RGMA/TNC/MAP1B/FLNA/APOD	8
BP	GO:0045766	positive regulation of angiogenesis	12/326	175/18862	5.50484e-05	0.00106652	0.000771422	SFRP2/VEGFC/PRKD1/GREM1/THBS1/CYP1B1/PTGIS/TEK/ITGA5/SMOC2/HSPB6/C3	12
BP	GO:1904018	positive regulation of vasculature development	12/326	175/18862	5.50484e-05	0.00106652	0.000771422	SFRP2/VEGFC/PRKD1/GREM1/THBS1/CYP1B1/PTGIS/TEK/ITGA5/SMOC2/HSPB6/C3	12
BP	GO:1901343	negative regulation of vasculature development	11/326	149/18862	5.75818e-05	0.00110941	0.000802441	SPARC/DCN/EMILIN1/THBS2/SERPINF1/THBS4/THBS1/SULF1/TEK/ATP2B4/ADAMTS1	11
BP	GO:0071621	granulocyte chemotaxis	10/326	124/18862	5.93228e-05	0.00112705	0.0008152	JAM3/SLIT2/THBS4/RARRES2/THBS1/CSF1R/CCL2/CCL21/CCL19/CCL20	10
BP	GO:0051894	positive regulation of focal adhesion assembly	5/326	25/18862	5.97973e-05	0.00112705	0.0008152	FERMT2/THY1/TEK/SFRP1/COL16A1	5
BP	GO:0072012	glomerulus vasculature development	5/326	25/18862	5.97973e-05	0.00112705	0.0008152	PDGFRB/ACTA2/TEK/TCF21/PDGFRA	5
BP	GO:2000050	regulation of non-canonical Wnt signaling pathway	5/326	25/18862	5.97973e-05	0.00112705	0.0008152	SFRP2/SFRP4/DACT1/RSPO3/SFRP1	5
BP	GO:0030100	regulation of endocytosis	13/326	206/18862	6.40757e-05	0.00120116	0.000868804	RAB31/SFRP4/CLIP3/PRKD1/GREM1/SYT11/AXL/STON1/CAV1/EPHA3/C3/CCL21/CCL19	13
BP	GO:1905314	semi-lunar valve development	6/326	41/18862	6.87377e-05	0.00128163	0.000927006	EMILIN1/SLIT2/HEYL/SNAI2/SLIT3/ELN	6
BP	GO:0016049	cell growth	21/326	470/18862	7.49449e-05	0.00138989	0.00100531	SFRP2/NDN/SPOCK1/IGFBP7/SLIT2/GREM1/IGFBP4/DACT3/CRYAB/IGFBP5/CXCL12/RGS4/POSTN/SFRP1/SLIT3/MAP1B/RERG/FHL1/FRZB/SERPINE2/PI16	21
BP	GO:0018108	peptidyl-tyrosine phosphorylation	18/326	369/18862	8.18309e-05	0.00150952	0.00109184	DDR2/SFRP2/PDGFRB/THY1/THBS4/GREM1/AXL/ROR2/EFEMP1/TEK/FGF7/SFRP1/ITGA5/GHR/CAV1/EPHA3/PDGFRA/CSF1R	18
BP	GO:0071230	cellular response to amino acid stimulus	7/326	61/18862	8.46474e-05	0.00155321	0.00112345	COL1A2/COL5A2/MMP2/COL6A1/COL1A1/COL16A1/PDGFRA	7
BP	GO:0033688	regulation of osteoblast proliferation	5/326	27/18862	8.83209e-05	0.00161209	0.00116603	GREM1/TMEM119/MN1/SFRP1/CTHRC1	5
BP	GO:0001558	regulation of cell growth	19/326	406/18862	9.02187e-05	0.00163768	0.00118454	SFRP2/SPOCK1/IGFBP7/SLIT2/GREM1/IGFBP4/DACT3/CRYAB/IGFBP5/CXCL12/RGS4/SFRP1/SLIT3/MAP1B/RERG/FHL1/FRZB/SERPINE2/PI16	19
BP	GO:0018212	peptidyl-tyrosine modification	18/326	372/18862	9.06674e-05	0.00163768	0.00118454	DDR2/SFRP2/PDGFRB/THY1/THBS4/GREM1/AXL/ROR2/EFEMP1/TEK/FGF7/SFRP1/ITGA5/GHR/CAV1/EPHA3/PDGFRA/CSF1R	18
BP	GO:0030168	platelet activation	11/326	157/18862	9.24001e-05	0.00166033	0.00120092	COL3A1/COL1A2/AXL/MYL9/COL1A1/PDPN/CSRP1/PDGFRA/SERPINE2/FLNA/COMP	11
BP	GO:0032835	glomerulus development	7/326	62/18862	9.40241e-05	0.00166365	0.00120333	PDGFRB/ACTA2/SULF1/HEYL/TEK/TCF21/PDGFRA	7
BP	GO:0042698	ovulation cycle	7/326	62/18862	9.40241e-05	0.00166365	0.00120333	TGFB3/SERPINF1/SLIT2/AXL/SLIT3/PDGFRA/ADAMTS1	7
BP	GO:0070527	platelet aggregation	7/326	62/18862	9.40241e-05	0.00166365	0.00120333	MYL9/PDPN/CSRP1/PDGFRA/SERPINE2/FLNA/COMP	7
BP	GO:0003018	vascular process in circulatory system	14/326	245/18862	9.84736e-05	0.00171611	0.00124127	EDNRA/SLIT2/FERMT2/KCNJ8/ACTA2/TEK/SLC24A3/CAV1/KCNMA1/ATP2B4/AKAP12/ATP1A2/COMP/TACR2	14
BP	GO:0010951	negative regulation of endopeptidase activity	14/326	245/18862	9.84736e-05	0.00171611	0.00124127	TIMP2/TIMP3/COL6A3/SFRP2/SPOCK1/SERPINF1/THBS1/RECK/SERPING1/CRYAB/SERPINE2/A2M/C3/PI3	14
BP	GO:0045926	negative regulation of growth	14/326	245/18862	9.84736e-05	0.00171611	0.00124127	SFRP2/SLIT2/GREM1/DACT3/CRYAB/IGFBP5/RGS4/SFRP1/SLIT3/RERG/FHL1/FRZB/SERPINE2/PI16	14
BP	GO:0006024	glycosaminoglycan biosynthetic process	9/326	107/18862	0.000100112	0.00173595	0.00125562	DCN/BGN/PDGFRB/LUM/OMD/VCAN/OGN/PRELP/FMOD	9
BP	GO:0002468	dendritic cell antigen processing and presentation	4/326	15/18862	0.000102858	0.00176507	0.00127668	THBS1/FGL2/CCL21/CCL19	4
BP	GO:2000095	regulation of Wnt signaling pathway, planar cell polarity pathway	4/326	15/18862	0.000102858	0.00176507	0.00127668	SFRP2/DACT1/RSPO3/SFRP1	4
BP	GO:0060324	face development	6/326	44/18862	0.000103319	0.00176507	0.00127668	TGFB3/CRISPLD2/MMP2/COL1A1/ALDH1A3/PDGFRA	6
BP	GO:0043010	camera-type eye development	16/326	310/18862	0.000105922	0.00179336	0.00129714	COL8A1/FBN1/PDGFRB/SERPINF1/COL8A2/VIM/THY1/EFEMP1/CYP1B1/RHOJ/CRYAB/CLIC4/ALDH1A3/ATP2B4/PDGFRA/TMOD1	16
BP	GO:0018146	keratan sulfate biosynthetic process	5/326	28/18862	0.000106009	0.00179336	0.00129714	LUM/OMD/OGN/PRELP/FMOD	5
BP	GO:0034446	substrate adhesion-dependent cell spreading	9/326	108/18862	0.000107582	0.00181113	0.00131	ANTXR1/FERMT2/AXL/FBLN1/TEK/POSTN/LIMS2/PDPN/FLNA	9
BP	GO:0050680	negative regulation of epithelial cell proliferation	11/326	160/18862	0.000109448	0.00183366	0.00132629	SPARC/SFRP2/SERPINF1/THBS1/SULF1/SNAI2/SFRP1/LIMS2/CAV1/KLF9/CCL2	11
BP	GO:0060047	heart contraction	15/326	279/18862	0.000110678	0.00183762	0.00132916	KCNJ8/SGCD/FXYD6/RGS4/CACNA1H/HSPB7/CAV1/ATP2B4/TPM1/PLN/CASQ2/POPDC2/DES/ATP1A2/FLNA	15
BP	GO:0034109	homotypic cell-cell adhesion	8/326	85/18862	0.000110745	0.00183762	0.00132916	LGALS1/MYL9/PDPN/CSRP1/PDGFRA/SERPINE2/FLNA/COMP	8
BP	GO:0055123	digestive system development	10/326	134/18862	0.000113904	0.00188104	0.00136057	TGFB3/SFRP2/RARRES2/DACT1/SFRP1/TCF21/FOXF1/BARX1/PDGFRA/RBPMS2	10
BP	GO:0045861	negative regulation of proteolysis	17/326	346/18862	0.000117945	0.00193855	0.00140216	GAS1/TIMP2/TIMP3/COL6A3/SFRP2/SPOCK1/SERPINF1/THBS1/MAP1A/RECK/SERPING1/CRYAB/SERPINE2/A2M/PI16/C3/PI3	17
BP	GO:0060021	roof of mouth development	8/326	86/18862	0.000120296	0.00196785	0.00142336	PRRX1/TGFB3/LRRC32/BNC2/TCF21/MEOX2/HAND2/PDGFRA	8
BP	GO:0060325	face morphogenesis	5/326	29/18862	0.000126293	0.00205626	0.0014873	TGFB3/CRISPLD2/MMP2/COL1A1/PDGFRA	5
BP	GO:0022612	gland morphogenesis	9/326	111/18862	0.000132846	0.00215285	0.00155717	TGFB3/SULF1/IGFBP5/TNC/FGF7/SFRP1/LIMS2/CAV1/CSF1R	9
BP	GO:0031099	regeneration	12/326	192/18862	0.000133625	0.0021554	0.00155901	PRRX1/JAM3/THY1/AXL/RGMA/CXCL12/TNC/POSTN/MAP1B/NNMT/FLNA/APOD	12
BP	GO:0048557	embryonic digestive tract morphogenesis	4/326	16/18862	0.000135282	0.00217203	0.00157104	TCF21/FOXF1/PDGFRA/RBPMS2	4
BP	GO:1903034	regulation of response to wounding	11/326	164/18862	0.000136299	0.00217827	0.00157555	FAP/FERMT2/THBS1/RGMA/SERPING1/MYLK/SMOC2/CAV1/PDGFRA/SERPINE2/FLNA	11
BP	GO:0070482	response to oxygen levels	18/326	385/18862	0.000139446	0.00221834	0.00160454	TGFB3/EDNRA/PDGFRB/VEGFC/THBS1/PTGIS/MMP2/CRYAB/COL1A1/CXCL12/TEK/POSTN/SFRP1/KCNMB1/SOD3/CAV1/PDPN/KCNMA1	18
BP	GO:0000302	response to reactive oxygen species	13/326	224/18862	0.00014899	0.00235062	0.00170021	PDGFRB/PKD2/AXL/CYP1B1/MMP2/CRYAB/COL1A1/FBLN5/SOD3/TPM1/PDGFRA/APOD/CCL19	13
BP	GO:0150117	positive regulation of cell-substrate junction organization	5/326	30/18862	0.000149421	0.00235062	0.00170021	FERMT2/THY1/TEK/SFRP1/COL16A1	5
BP	GO:0010712	regulation of collagen metabolic process	6/326	47/18862	0.000150472	0.00235062	0.00170021	FAP/TGFB3/PDGFRB/EMILIN1/VIM/MFAP4	6
BP	GO:0030574	collagen catabolic process	6/326	47/18862	0.000150472	0.00235062	0.00170021	FAP/CTSK/COL15A1/MMP2/ADAMTS2/MMP11	6
BP	GO:0010812	negative regulation of cell-substrate adhesion	7/326	67/18862	0.000154456	0.00239131	0.00172964	SPOCK1/THBS1/LGALS1/FBLN1/COL1A1/POSTN/APOD	7
BP	GO:1900046	regulation of hemostasis	7/326	67/18862	0.000154456	0.00239131	0.00172964	FAP/THBS1/SERPING1/CAV1/PDGFRA/SERPINE2/COMP	7
BP	GO:0006023	aminoglycan biosynthetic process	9/326	114/18862	0.000162888	0.00250118	0.00180911	DCN/BGN/PDGFRB/LUM/OMD/VCAN/OGN/PRELP/FMOD	9
BP	GO:0003015	heart process	15/326	289/18862	0.000162995	0.00250118	0.00180911	KCNJ8/SGCD/FXYD6/RGS4/CACNA1H/HSPB7/CAV1/ATP2B4/TPM1/PLN/CASQ2/POPDC2/DES/ATP1A2/FLNA	15
BP	GO:0060349	bone morphogenesis	8/326	90/18862	0.000165566	0.00252944	0.00182956	TGFB3/SFRP2/SFRP4/TMEM119/RAB23/COL1A1/TEK/COMP	8
BP	GO:0038084	vascular endothelial growth factor signaling pathway	6/326	48/18862	0.000169495	0.00256941	0.00185846	DCN/PDGFRB/VEGFC/PRKD1/SMOC2/PDGFRA	6
BP	GO:0002548	monocyte chemotaxis	7/326	68/18862	0.000169664	0.00256941	0.00185846	SLIT2/GREM1/CXCL12/CCL2/CCL21/CCL19/CCL20	7
BP	GO:2000811	negative regulation of anoikis	4/326	17/18862	0.000174507	0.00263126	0.0019032	SNAI2/ITGA5/CAV1/PDK4	4
BP	GO:0048566	embryonic digestive tract development	5/326	31/18862	0.000175652	0.00263707	0.0019074	RARRES2/TCF21/FOXF1/PDGFRA/RBPMS2	5
BP	GO:0010975	regulation of neuron projection development	19/326	428/18862	0.000178521	0.00266187	0.00192534	PRRX1/DPYSL3/SFRP2/SPOCK1/SERPINF1/SLIT2/VIM/THY1/PRKD1/LGALS1/ROR2/RGMA/LZTS1/CXCL12/SFRP1/MAP1B/EPHA3/NR2F1/FLNA	19
BP	GO:0002690	positive regulation of leukocyte chemotaxis	8/326	91/18862	0.000178839	0.00266187	0.00192534	VEGFC/THBS4/RARRES2/THBS1/CXCL12/CSF1R/CCL21/CCL19	8
BP	GO:0072132	mesenchyme morphogenesis	6/326	49/18862	0.000190369	0.00280937	0.00203203	ACTA2/HEYL/SNAI2/FOXF1/ACTG2/TMEM100	6
BP	GO:1900047	negative regulation of hemostasis	6/326	49/18862	0.000190369	0.00280937	0.00203203	FAP/THBS1/SERPING1/PDGFRA/SERPINE2/COMP	6
BP	GO:0010594	regulation of endothelial cell migration	13/326	231/18862	0.000201806	0.00296552	0.00214497	SPARC/DCN/SERPINF1/SLIT2/VEGFC/PRKD1/THBS1/RHOJ/SRPX2/TEK/SMOC2/MEOX2/ATP2B4	13
BP	GO:0033687	osteoblast proliferation	5/326	32/18862	0.000205257	0.00299088	0.00216332	GREM1/TMEM119/MN1/SFRP1/CTHRC1	5
BP	GO:0090022	regulation of neutrophil chemotaxis	5/326	32/18862	0.000205257	0.00299088	0.00216332	JAM3/SLIT2/THBS4/CCL21/CCL19	5
BP	GO:0009612	response to mechanical stimulus	12/326	202/18862	0.000214634	0.00311444	0.00225269	COL3A1/DCN/THBS1/PKD2/COL1A1/CXCL12/TNC/POSTN/MAP1B/SERPINE2/ATP1A2/COL11A1	12
BP	GO:0007015	actin filament organization	19/326	435/18862	0.000219342	0.00316949	0.00229251	TGFB3/DPYSL3/CALD1/SLIT2/FERMT2/GAS7/CXCL12/RGS4/SFRP1/LMOD1/TPM2/ELN/SVIL/TPM1/SYNPO2/SORBS1/FLNA/TMOD1/CCL21	19
BP	GO:0006957	complement activation, alternative pathway	4/326	18/18862	0.000221323	0.00318484	0.00230361	C7/CFH/C3/CFD	4
BP	GO:0001101	response to acid chemical	9/326	119/18862	0.000225465	0.00323104	0.00233703	COL1A2/COL5A2/PKD2/MMP2/COL6A1/COL1A1/ATP2B4/COL16A1/PDGFRA	9
BP	GO:0032964	collagen biosynthetic process	6/326	51/18862	0.000238178	0.00336246	0.00243208	TGFB3/PDGFRB/EMILIN1/VIM/COL5A1/COL1A1	6
BP	GO:0042339	keratan sulfate metabolic process	5/326	33/18862	0.000238514	0.00336246	0.00243208	LUM/OMD/OGN/PRELP/FMOD	5
BP	GO:0060323	head morphogenesis	5/326	33/18862	0.000238514	0.00336246	0.00243208	TGFB3/CRISPLD2/MMP2/COL1A1/PDGFRA	5
BP	GO:1901020	negative regulation of calcium ion transmembrane transporter activity	5/326	33/18862	0.000238514	0.00336246	0.00243208	PKD2/GEM/PLN/CASQ2/ATP1A2	5
BP	GO:2000027	regulation of animal organ morphogenesis	11/326	176/18862	0.000252825	0.00353841	0.00255935	SFRP2/GREM1/DACT1/SULF1/ROR2/RSPO3/PRICKLE2/PRICKLE1/FGF7/SFRP1/CTHRC1	11
BP	GO:0070372	regulation of ERK1 and ERK2 cascade	15/326	301/18862	0.000253035	0.00353841	0.00255935	TIMP3/PDGFRB/EMILIN1/FERMT2/FBLN1/TEK/GPNMB/HAND2/PDGFRA/CSF1R/CCL2/AKAP12/CCL21/CCL19/CCL20	15
BP	GO:0071774	response to fibroblast growth factor	10/326	148/18862	0.00025731	0.00356941	0.00258177	THBS1/SULF1/FLRT2/COL1A1/TNC/FGF7/POSTN/SFRP1/SMOC2/CCL2	10
BP	GO:0097530	granulocyte migration	10/326	148/18862	0.00025731	0.00356941	0.00258177	JAM3/SLIT2/THBS4/RARRES2/THBS1/CSF1R/CCL2/CCL21/CCL19/CCL20	10
BP	GO:1901890	positive regulation of cell junction assembly	8/326	96/18862	0.000259013	0.00357871	0.0025885	FERMT2/THY1/FLRT2/SRPX2/TEK/SFRP1/CAV1/COL16A1	8
BP	GO:0031103	axon regeneration	6/326	52/18862	0.000265378	0.00363942	0.00263241	JAM3/RGMA/TNC/MAP1B/FLNA/APOD	6
BP	GO:0001936	regulation of endothelial cell proliferation	11/326	177/18862	0.000265506	0.00363942	0.00263241	SPARC/VEGFC/PRKD1/THBS4/THBS1/SULF1/CXCL12/TEK/CAV1/CCL2/VIP	11
BP	GO:0051924	regulation of calcium ion transport	13/326	238/18862	0.000269937	0.0036856	0.00266581	PDGFRB/THY1/PKD2/GEM/MYLK/CXCL12/RGS4/CAV1/PLN/CASQ2/CCL2/ATP1A2/JPH2	13
BP	GO:0033280	response to vitamin D	5/326	34/18862	0.000275712	0.00370976	0.00268328	MN1/TNC/KANK2/SNAI2/SFRP1	5
BP	GO:0044319	wound healing, spreading of cells	5/326	34/18862	0.000275712	0.00370976	0.00268328	FERMT2/COL5A1/ITGA5/PDPN/FLNA	5
BP	GO:0090505	epiboly involved in wound healing	5/326	34/18862	0.000275712	0.00370976	0.00268328	FERMT2/COL5A1/ITGA5/PDPN/FLNA	5
BP	GO:0045807	positive regulation of endocytosis	8/326	97/18862	0.000278125	0.00370976	0.00268328	RAB31/SFRP4/CLIP3/GREM1/AXL/C3/CCL21/CCL19	8
BP	GO:1990868	response to chemokine	8/326	97/18862	0.000278125	0.00370976	0.00268328	SLIT2/CXCL12/SLIT3/LOX/CCL2/CCL21/CCL19/CCL20	8
BP	GO:1990869	cellular response to chemokine	8/326	97/18862	0.000278125	0.00370976	0.00268328	SLIT2/CXCL12/SLIT3/LOX/CCL2/CCL21/CCL19/CCL20	8
BP	GO:0048738	cardiac muscle tissue development	12/326	208/18862	0.000280955	0.00373314	0.0027002	PDGFRB/HEG1/SGCD/GREM1/RGS4/MYH11/TPM1/PDGFRA/PLN/JPH2/PI16/COL11A1	12
BP	GO:0006816	calcium ion transport	18/326	409/18862	0.000292144	0.00384217	0.00277906	PDGFRB/THY1/PKD2/GEM/MYLK/CXCL12/RGS4/SLC24A3/CACNA1H/CAV1/ATP2B4/PLN/CASQ2/CCL2/ATP1A2/JPH2/CCL21/CCL19	18
BP	GO:0007369	gastrulation	11/326	179/18862	0.000292484	0.00384217	0.00277906	COL8A1/SFRP2/COL5A1/COL5A2/MMP2/COL6A1/COL12A1/SFRP1/ITGA5/FOXF1/COL11A1	11
BP	GO:0030177	positive regulation of Wnt signaling pathway	11/326	179/18862	0.000292484	0.00384217	0.00277906	SFRP2/SFRP4/DACT1/RECK/SULF1/ROR2/RSPO3/COL1A1/DIXDC1/SFRP1/CAV1	11
BP	GO:0003179	heart valve morphogenesis	6/326	53/18862	0.000294959	0.00384556	0.00278151	EMILIN1/SLIT2/HEYL/SNAI2/SLIT3/ELN	6
BP	GO:1905517	macrophage migration	6/326	53/18862	0.000294959	0.00384556	0.00278151	EMILIN1/RARRES2/THBS1/ROR2/CSF1R/CCL2	6
BP	GO:0043491	protein kinase B signaling	14/326	273/18862	0.000302673	0.00391668	0.00283295	PDGFRB/FERMT2/THBS1/AXL/IGFBP5/TEK/FGF7/LOX/PDGFRA/PHLDA3/CCL2/TMEM100/CCL21/CCL19	14
BP	GO:0110053	regulation of actin filament organization	14/326	273/18862	0.000302673	0.00391668	0.00283295	TGFB3/SLIT2/FERMT2/CXCL12/RGS4/SFRP1/LMOD1/ELN/SVIL/TPM1/SYNPO2/FLNA/TMOD1/CCL21	14
BP	GO:0070374	positive regulation of ERK1 and ERK2 cascade	12/326	210/18862	0.000306612	0.0039529	0.00285915	PDGFRB/FERMT2/TEK/GPNMB/HAND2/PDGFRA/CSF1R/CCL2/AKAP12/CCL21/CCL19/CCL20	12
BP	GO:0048009	insulin-like growth factor receptor signaling pathway	5/326	35/18862	0.000317152	0.00405861	0.00293561	IGFBP4/IGFBP5/CILP/IGFBP6/GHR	5
BP	GO:0090504	epiboly	5/326	35/18862	0.000317152	0.00405861	0.00293561	FERMT2/COL5A1/ITGA5/PDPN/FLNA	5
BP	GO:0060402	calcium ion transport into cytosol	10/326	152/18862	0.000318876	0.00406566	0.00294071	THY1/PKD2/CAV1/ATP2B4/PLN/CASQ2/ATP1A2/JPH2/CCL21/CCL19	10
BP	GO:0048565	digestive tract development	9/326	125/18862	0.000325701	0.00413747	0.00299265	TGFB3/SFRP2/RARRES2/DACT1/SFRP1/TCF21/FOXF1/PDGFRA/RBPMS2	9
BP	GO:0035567	non-canonical Wnt signaling pathway	10/326	153/18862	0.000336053	0.0042534	0.00307651	SFRP2/SFRP4/DACT1/ROR2/RSPO3/PRICKLE2/PRICKLE1/SFRP1/CTHRC1/FRZB	10
BP	GO:0030500	regulation of bone mineralization	7/326	76/18862	0.00034014	0.00428466	0.00309912	DDR2/TGFB3/OMD/GREM1/MGP/TMEM119/COMP	7
BP	GO:0002577	regulation of antigen processing and presentation	4/326	20/18862	0.000340994	0.00428466	0.00309912	THBS1/FGL2/CCL21/CCL19	4
BP	GO:0051017	actin filament bundle assembly	10/326	154/18862	0.000353996	0.00443198	0.00320567	TGFB3/DPYSL3/CALD1/FERMT2/SFRP1/ELN/TPM1/SYNPO2/SORBS1/FLNA	10
BP	GO:0008016	regulation of heart contraction	13/326	245/18862	0.00035684	0.00445151	0.0032198	FXYD6/RGS4/CACNA1H/HSPB7/CAV1/ATP2B4/TPM1/PLN/CASQ2/POPDC2/DES/ATP1A2/FLNA	13
BP	GO:0035904	aorta development	6/326	55/18862	0.000361848	0.00449781	0.00325329	EFEMP2/PDGFRB/PKD2/MYLK/PRICKLE1/LOX	6
BP	GO:0017015	regulation of transforming growth factor beta receptor signaling pathway	9/326	127/18862	0.000366341	0.0045374	0.00328192	TGFB3/FBN1/EMILIN1/THBS1/HTRA1/TGFB1I1/DKK3/CAV1/LOX	9
BP	GO:0002040	sprouting angiogenesis	11/326	184/18862	0.000370212	0.00456902	0.0033048	SLIT2/VEGFC/GREM1/THBS1/RECK/RSPO3/RHOJ/SRPX2/TEK/ITGA5/MEOX2	11
BP	GO:0052547	regulation of peptidase activity	19/326	455/18862	0.00038429	0.00472595	0.0034183	TIMP2/TIMP3/COL6A3/SFRP2/SPOCK1/ANTXR1/SERPINF1/PCOLCE/THBS1/RECK/FBLN1/SERPING1/CRYAB/CAV1/SERPINE2/A2M/PI16/C3/PI3	19
BP	GO:0010959	regulation of metal ion transport	13/326	247/18862	0.000385662	0.00472606	0.00341838	PDGFRB/THY1/PKD2/GEM/MYLK/CXCL12/RGS4/CAV1/PLN/CASQ2/CCL2/ATP1A2/JPH2	13
BP	GO:0002062	chondrocyte differentiation	8/326	103/18862	0.000418503	0.00511046	0.00369642	SFRP2/GREM1/SULF1/EFEMP1/SNAI2/TGFBI/COMP/COL11A1	8
BP	GO:0061572	actin filament bundle organization	10/326	158/18862	0.00043396	0.00527567	0.00381592	TGFB3/DPYSL3/CALD1/FERMT2/SFRP1/ELN/TPM1/SYNPO2/SORBS1/FLNA	10
BP	GO:1903844	regulation of cellular response to transforming growth factor beta stimulus	9/326	130/18862	0.000435075	0.00527567	0.00381592	TGFB3/FBN1/EMILIN1/THBS1/HTRA1/TGFB1I1/DKK3/CAV1/LOX	9
BP	GO:0043551	regulation of phosphatidylinositol 3-kinase activity	6/326	57/18862	0.00044005	0.00529893	0.00383274	PDGFRB/PRKD1/TEK/PDGFRA/CCL21/CCL19	6
BP	GO:1900024	regulation of substrate adhesion-dependent cell spreading	6/326	57/18862	0.00044005	0.00529893	0.00383274	FERMT2/FBLN1/POSTN/LIMS2/PDPN/FLNA	6
BP	GO:0010038	response to metal ion	16/326	352/18862	0.000442751	0.00531301	0.00384293	SPARC/SERPINF1/THBS1/SYT11/PKD2/CYBRD1/FIBIN/CLIC4/KCNMB1/CACNA1H/SOD3/CAV1/KCNMA1/PLN/CASQ2/FABP4	16
BP	GO:0061041	regulation of wound healing	9/326	131/18862	0.000460215	0.00550354	0.00398074	FAP/FERMT2/THBS1/SERPING1/MYLK/SMOC2/CAV1/PDGFRA/SERPINE2	9
BP	GO:0043271	negative regulation of ion transport	15/326	319/18862	0.000467397	0.00557022	0.00402896	SFRP4/THBS1/SYT11/PKD2/GEM/RAB23/RGS4/SFRP1/CAV1/PLN/CASQ2/SERPINE2/ATP1A2/APOD/VIP	15
BP	GO:0070371	ERK1 and ERK2 cascade	15/326	320/18862	0.000482876	0.00573498	0.00414814	TIMP3/PDGFRB/EMILIN1/FERMT2/FBLN1/TEK/GPNMB/HAND2/PDGFRA/CSF1R/CCL2/AKAP12/CCL21/CCL19/CCL20	15
BP	GO:0045444	fat cell differentiation	12/326	221/18862	0.000486083	0.00575336	0.00416143	SFRP2/FERMT2/CLIP3/RARRES2/TGFB1I1/MAFB/SFRP1/PDGFRA/FRZB/DIO2/FABP4/MMP11	12
BP	GO:0055093	response to hyperoxia	4/326	22/18862	0.00050099	0.00590964	0.00427447	PDGFRB/COL1A1/CAV1/PDPN	4
BP	GO:0006937	regulation of muscle contraction	10/326	161/18862	0.000503329	0.0059171	0.00427986	MYL9/CNN1/HSPB6/CAV1/KCNMA1/TPM1/PLN/CASQ2/ATP1A2/TACR2	10
BP	GO:0001935	endothelial cell proliferation	11/326	191/18862	0.000507629	0.00594749	0.00430185	SPARC/VEGFC/PRKD1/THBS4/THBS1/SULF1/CXCL12/TEK/CAV1/CCL2/VIP	11
BP	GO:0030049	muscle filament sliding	5/326	39/18862	0.000531618	0.00614551	0.00444507	VIM/TPM2/TPM1/DES/TMOD1	5
BP	GO:0033275	actin-myosin filament sliding	5/326	39/18862	0.000531618	0.00614551	0.00444507	VIM/TPM2/TPM1/DES/TMOD1	5
BP	GO:0072210	metanephric nephron development	5/326	39/18862	0.000531618	0.00614551	0.00444507	PDGFRB/GREM1/PKD2/TCF21/PDGFRA	5
BP	GO:1903170	negative regulation of calcium ion transmembrane transport	5/326	39/18862	0.000531618	0.00614551	0.00444507	PKD2/GEM/PLN/CASQ2/ATP1A2	5
BP	GO:0032102	negative regulation of response to external stimulus	17/326	394/18862	0.000535724	0.0061724	0.00446453	FAP/SERPINF1/SLIT2/GREM1/THBS1/SYT11/HTRA1/PTGIS/RGMA/SERPING1/TEK/FOXF1/PDGFRA/CCL2/SERPINE2/A2M/FGL2	17
BP	GO:0097553	calcium ion transmembrane import into cytosol	9/326	134/18862	0.000542897	0.00623432	0.00450931	THY1/PKD2/ATP2B4/PLN/CASQ2/ATP1A2/JPH2/CCL21/CCL19	9
BP	GO:0070561	vitamin D receptor signaling pathway	3/326	10/18862	0.000560955	0.00642043	0.00464393	MN1/KANK2/SNAI2	3
BP	GO:0060071	Wnt signaling pathway, planar cell polarity pathway	8/326	108/18862	0.000575269	0.00656261	0.00474677	SFRP2/DACT1/ROR2/RSPO3/PRICKLE2/PRICKLE1/SFRP1/CTHRC1	8
BP	GO:0070509	calcium ion import	7/326	83/18862	0.000582896	0.00658463	0.0047627	PDGFRB/PKD2/CXCL12/CACNA1H/ATP2B4/PLN/CCL2	7
BP	GO:1904705	regulation of vascular associated smooth muscle cell proliferation	7/326	83/18862	0.000582896	0.00658463	0.0047627	TGFB3/EFEMP2/MMP2/IGFBP5/CNN1/TPM1/ADAMTS1	7
BP	GO:1990874	vascular associated smooth muscle cell proliferation	7/326	83/18862	0.000582896	0.00658463	0.0047627	TGFB3/EFEMP2/MMP2/IGFBP5/CNN1/TPM1/ADAMTS1	7
BP	GO:0071676	negative regulation of mononuclear cell migration	4/326	23/18862	0.000598259	0.00671445	0.00485659	SLIT2/GREM1/CCL2/APOD	4
BP	GO:1903055	positive regulation of extracellular matrix organization	4/326	23/18862	0.000598259	0.00671445	0.00485659	DDR2/EFEMP2/EMILIN1/PDPN	4
BP	GO:0007584	response to nutrient	10/326	165/18862	0.0006099	0.00682301	0.00493511	SPARC/SFRP2/MN1/COL1A1/TNC/KANK2/SNAI2/POSTN/SFRP1/MAP1B	10
BP	GO:0010632	regulation of epithelial cell migration	14/326	293/18862	0.000612898	0.0068345	0.00494343	SPARC/DCN/SERPINF1/SLIT2/VEGFC/PRKD1/THBS1/RHOJ/SRPX2/TEK/FGF7/SMOC2/MEOX2/ATP2B4	14
BP	GO:0003170	heart valve development	6/326	61/18862	0.00063556	0.0070645	0.00510979	EMILIN1/SLIT2/HEYL/SNAI2/SLIT3/ELN	6
BP	GO:0072006	nephron development	9/326	138/18862	0.000671708	0.00742985	0.00537405	PDGFRB/ACTA2/GREM1/PKD2/SULF1/HEYL/TEK/TCF21/PDGFRA	9
BP	GO:0090279	regulation of calcium ion import	5/326	41/18862	0.000672714	0.00742985	0.00537405	PDGFRB/PKD2/CXCL12/PLN/CCL2	5
BP	GO:0032233	positive regulation of actin filament bundle assembly	6/326	62/18862	0.000693582	0.00763601	0.00552316	TGFB3/FERMT2/SFRP1/TPM1/SYNPO2/FLNA	6
BP	GO:0043567	regulation of insulin-like growth factor receptor signaling pathway	4/326	24/18862	0.000708207	0.00774783	0.00560404	IGFBP4/IGFBP5/CILP/IGFBP6	4
BP	GO:2000209	regulation of anoikis	4/326	24/18862	0.000708207	0.00774783	0.00560404	SNAI2/ITGA5/CAV1/PDK4	4
BP	GO:0030278	regulation of ossification	8/326	112/18862	0.000732243	0.00793568	0.00573992	DDR2/TGFB3/OMD/GREM1/MGP/TMEM119/SFRP1/COMP	8
BP	GO:0051209	release of sequestered calcium ion into cytosol	8/326	112/18862	0.000732243	0.00793568	0.00573992	THY1/PKD2/PLN/CASQ2/ATP1A2/JPH2/CCL21/CCL19	8
BP	GO:0090175	regulation of establishment of planar polarity	8/326	112/18862	0.000732243	0.00793568	0.00573992	SFRP2/DACT1/ROR2/RSPO3/PRICKLE2/PRICKLE1/SFRP1/CTHRC1	8
BP	GO:0016331	morphogenesis of embryonic epithelium	9/326	140/18862	0.0007449	0.00804505	0.00581902	SFRP2/VEGFC/GREM1/SULF1/TGFB1I1/PRICKLE1/SFRP1/CTHRC1/ALDH1A3	9
BP	GO:0006813	potassium ion transport	12/326	232/18862	0.000746974	0.00804505	0.00581902	KCNJ8/PKD2/RGS4/SLC24A3/KCNMB1/FHL1/CAV1/KCNMA1/CASQ2/ATP1A2/FLNA/VIP	12
BP	GO:0043114	regulation of vascular permeability	5/326	42/18862	0.00075294	0.00805925	0.0058293	SLIT2/FERMT2/TEK/AKAP12/TACR2	5
BP	GO:1902622	regulation of neutrophil migration	5/326	42/18862	0.00075294	0.00805925	0.0058293	JAM3/SLIT2/THBS4/CCL21/CCL19	5
BP	GO:2000401	regulation of lymphocyte migration	6/326	63/18862	0.000755619	0.00806304	0.00583203	JAM2/CXCL12/CCL2/APOD/CCL21/CCL20	6
BP	GO:0061299	retina vasculature morphogenesis in camera-type eye	3/326	11/18862	0.000761463	0.00810047	0.00585911	CYP1B1/RHOJ/CLIC4	3
BP	GO:1904063	negative regulation of cation transmembrane transport	7/326	87/18862	0.000773639	0.00820483	0.00593459	PKD2/GEM/RGS4/CAV1/PLN/CASQ2/ATP1A2	7
BP	GO:0051283	negative regulation of sequestering of calcium ion	8/326	113/18862	0.000776429	0.00820932	0.00593784	THY1/PKD2/PLN/CASQ2/ATP1A2/JPH2/CCL21/CCL19	8
BP	GO:0044344	cellular response to fibroblast growth factor stimulus	9/326	142/18862	0.000824468	0.0086879	0.006284	THBS1/SULF1/FLRT2/COL1A1/FGF7/POSTN/SFRP1/SMOC2/CCL2	9
BP	GO:0070098	chemokine-mediated signaling pathway	7/326	88/18862	0.000828273	0.0086879	0.006284	SLIT2/CXCL12/SLIT3/CCL2/CCL21/CCL19/CCL20	7
BP	GO:0033622	integrin activation	4/326	25/18862	0.000831714	0.0086879	0.006284	JAM3/FERMT2/CXCL12/COL16A1	4
BP	GO:1905048	regulation of metallopeptidase activity	4/326	25/18862	0.000831714	0.0086879	0.006284	TIMP2/TIMP3/ANTXR1/RECK	4
BP	GO:0022602	ovulation cycle process	5/326	43/18862	0.000840099	0.00874914	0.0063283	TGFB3/SLIT2/SLIT3/PDGFRA/ADAMTS1	5
BP	GO:0048592	eye morphogenesis	9/326	143/18862	0.000866769	0.00896567	0.00648491	COL8A1/FBN1/COL8A2/COL5A1/THY1/MFAP5/COL5A2/EFEMP1/ALDH1A3	9
BP	GO:0048754	branching morphogenesis of an epithelial tube	9/326	143/18862	0.000866769	0.00896567	0.00648491	SFRP2/EDNRA/SLIT2/GREM1/PKD2/TNC/CLIC4/TCF21/FOXF1	9
BP	GO:0051282	regulation of sequestering of calcium ion	8/326	115/18862	0.000871232	0.00896567	0.00648491	THY1/PKD2/PLN/CASQ2/ATP1A2/JPH2/CCL21/CCL19	8
BP	GO:1903510	mucopolysaccharide metabolic process	8/326	115/18862	0.000871232	0.00896567	0.00648491	DCN/BGN/LUM/OMD/VCAN/OGN/PRELP/FMOD	8
BP	GO:0060401	cytosolic calcium ion transport	10/326	173/18862	0.000879315	0.00902208	0.00652572	THY1/PKD2/CAV1/ATP2B4/PLN/CASQ2/ATP1A2/JPH2/CCL21/CCL19	10
BP	GO:0046849	bone remodeling	7/326	89/18862	0.000885909	0.00906292	0.00655526	TGFB3/GREM1/TMEM119/SFRP1/CTHRC1/CSF1R/PDK4	7
BP	GO:0007585	respiratory gaseous exchange by respiratory system	6/326	65/18862	0.000892486	0.00910335	0.0065845	TSHZ3/NDN/EDNRA/MAFB/ELN/ATP1A2	6
BP	GO:1904062	regulation of cation transmembrane transport	15/326	340/18862	0.000898431	0.00913712	0.00660892	THY1/FXYD6/PKD2/GEM/RGS4/KCNMB1/FHL1/CAV1/ATP2B4/PLN/CASQ2/CCL2/ATP1A2/FLNA/JPH2	15
BP	GO:0001738	morphogenesis of a polarized epithelium	9/326	144/18862	0.000910819	0.00923602	0.00668046	SFRP2/DACT1/ROR2/RSPO3/PRICKLE2/PRICKLE1/SFRP1/CTHRC1/FOXF1	9
BP	GO:0042472	inner ear morphogenesis	7/326	90/18862	0.00094666	0.00957148	0.0069231	PRRX1/ROR2/MAFB/CTHRC1/ALDH1A3/FRZB/COL11A1	7
BP	GO:0051592	response to calcium ion	9/326	145/18862	0.000956669	0.00964456	0.00697596	SPARC/THBS1/SYT11/PKD2/CLIC4/KCNMB1/CAV1/KCNMA1/CASQ2	9
BP	GO:0051897	positive regulation of protein kinase B signaling	10/326	175/18862	0.000960079	0.00965088	0.00698053	PDGFRB/FERMT2/THBS1/AXL/IGFBP5/TEK/FGF7/PDGFRA/CCL21/CCL19	10
BP	GO:0030193	regulation of blood coagulation	6/326	66/18862	0.000967697	0.00966319	0.00698943	FAP/THBS1/SERPING1/CAV1/PDGFRA/SERPINE2	6
BP	GO:0002026	regulation of the force of heart contraction	4/326	26/18862	0.000969663	0.00966319	0.00698943	CAV1/ATP2B4/PLN/ATP1A2	4
BP	GO:0060314	regulation of ryanodine-sensitive calcium-release channel activity	4/326	26/18862	0.000969663	0.00966319	0.00698943	PKD2/PLN/CASQ2/JPH2	4
BP	GO:0001867	complement activation, lectin pathway	3/326	12/18862	0.00100233	0.00985073	0.00712508	SERPING1/MFAP4/A2M	3
BP	GO:0030208	dermatan sulfate biosynthetic process	3/326	12/18862	0.00100233	0.00985073	0.00712508	DCN/BGN/VCAN	3
BP	GO:0033629	negative regulation of cell adhesion mediated by integrin	3/326	12/18862	0.00100233	0.00985073	0.00712508	JAM3/CYP1B1/SNAI2	3
BP	GO:0090177	establishment of planar polarity involved in neural tube closure	3/326	12/18862	0.00100233	0.00985073	0.00712508	SFRP2/SFRP1/CTHRC1	3
BP	GO:0048839	inner ear development	10/326	176/18862	0.00100268	0.00985073	0.00712508	SPARC/PRRX1/TGFB3/PDGFRB/ROR2/MAFB/CTHRC1/ALDH1A3/FRZB/COL11A1	10
BP	GO:0060562	epithelial tube morphogenesis	14/326	309/18862	0.00102583	0.01004	0.00726198	SFRP2/EDNRA/SLIT2/GREM1/PKD2/TNC/PRICKLE1/CLIC4/SFRP1/TCF21/CTHRC1/FOXF1/HAND2/CSF1R	14
BP	GO:0051928	positive regulation of calcium ion transport	8/326	118/18862	0.00103063	0.01004	0.00726198	PDGFRB/THY1/PKD2/MYLK/CXCL12/CAV1/CCL2/JPH2	8
BP	GO:0072676	lymphocyte migration	8/326	118/18862	0.00103063	0.01004	0.00726198	JAM2/CXCL12/CH25H/CCL2/APOD/CCL21/CCL19/CCL20	8
BP	GO:0086009	membrane repolarization	5/326	45/18862	0.00103669	0.01006	0.00727641	KCNJ8/CAV1/CASQ2/ATP1A2/FLNA	5
BP	GO:0051346	negative regulation of hydrolase activity	18/326	456/18862	0.00103848	0.01006	0.00727641	TIMP2/TIMP3/COL6A3/SFRP2/SPOCK1/SERPINF1/SLIT2/THBS1/RECK/SERPING1/CRYAB/PLN/SERPINE2/A2M/PI16/PPP1R14A/C3/PI3	18
BP	GO:0045669	positive regulation of osteoblast differentiation	6/326	67/18862	0.00104769	0.0101208	0.00732045	DDR2/SFRP2/FERMT2/PRKD1/TMEM119/CTHRC1	6
BP	GO:0007519	skeletal muscle tissue development	9/326	147/18862	0.00105399	0.0101253	0.0073237	DCN/HEYL/TCF21/ELN/MEOX2/SVIL/CAV1/POPDC2/SMYD1	9
BP	GO:0090263	positive regulation of canonical Wnt signaling pathway	9/326	147/18862	0.00105399	0.0101253	0.0073237	SFRP2/SFRP4/DACT1/RECK/ROR2/RSPO3/COL1A1/SFRP1/CAV1	9
BP	GO:0045216	cell-cell junction organization	11/326	209/18862	0.00106729	0.0102248	0.00739564	CDH11/TGFB3/JAM3/FERMT2/HEG1/SNAI2/CNTNAP1/LIMS2/CAV1/CSF1R/FLNA	11
BP	GO:0034766	negative regulation of ion transmembrane transport	8/326	119/18862	0.00108867	0.0103722	0.00750228	THBS1/PKD2/GEM/RGS4/CAV1/PLN/CASQ2/ATP1A2	8
BP	GO:0051208	sequestering of calcium ion	8/326	119/18862	0.00108867	0.0103722	0.00750228	THY1/PKD2/PLN/CASQ2/ATP1A2/JPH2/CCL21/CCL19	8
BP	GO:0001666	response to hypoxia	15/326	348/18862	0.00113408	0.0107753	0.00779385	TGFB3/EDNRA/VEGFC/THBS1/PTGIS/MMP2/CRYAB/CXCL12/TEK/POSTN/SFRP1/KCNMB1/SOD3/CAV1/KCNMA1	15
BP	GO:0010171	body morphogenesis	5/326	46/18862	0.00114688	0.0108602	0.00785523	TGFB3/CRISPLD2/MMP2/COL1A1/PDGFRA	5
BP	GO:0034763	negative regulation of transmembrane transport	8/326	120/18862	0.00114928	0.0108602	0.00785523	THBS1/PKD2/GEM/RGS4/CAV1/PLN/CASQ2/ATP1A2	8
BP	GO:0031345	negative regulation of cell projection organization	10/326	180/18862	0.00118889	0.011204	0.00810392	DPYSL3/SPOCK1/SLIT2/VIM/THY1/LGALS1/RGMA/NR2F1/FLNA/CCL21	10
BP	GO:0071805	potassium ion transmembrane transport	11/326	212/18862	0.00119754	0.0112549	0.00814074	KCNJ8/PKD2/RGS4/SLC24A3/KCNMB1/FHL1/CAV1/KCNMA1/CASQ2/ATP1A2/FLNA	11
BP	GO:0043550	regulation of lipid kinase activity	6/326	69/18862	0.00122281	0.0114341	0.00827037	PDGFRB/PRKD1/TEK/PDGFRA/CCL21/CCL19	6
BP	GO:0070167	regulation of biomineral tissue development	7/326	94/18862	0.0012232	0.0114341	0.00827037	DDR2/TGFB3/OMD/GREM1/MGP/TMEM119/COMP	7
BP	GO:0001886	endothelial cell morphogenesis	3/326	13/18862	0.00128642	0.0118262	0.00855397	COL15A1/HEG1/CLIC4	3
BP	GO:0030205	dermatan sulfate metabolic process	3/326	13/18862	0.00128642	0.0118262	0.00855397	DCN/BGN/VCAN	3
BP	GO:0033689	negative regulation of osteoblast proliferation	3/326	13/18862	0.00128642	0.0118262	0.00855397	GREM1/MN1/SFRP1	3
BP	GO:1902043	positive regulation of extrinsic apoptotic signaling pathway via death domain receptors	3/326	13/18862	0.00128642	0.0118262	0.00855397	TIMP3/THBS1/SFRP1	3
BP	GO:1903054	negative regulation of extracellular matrix organization	3/326	13/18862	0.00128642	0.0118262	0.00855397	FAP/ANTXR1/EMILIN1	3
BP	GO:0061037	negative regulation of cartilage development	4/326	28/18862	0.00129243	0.0118262	0.00855397	GREM1/EFEMP1/SNAI2/FRZB	4
BP	GO:0072376	protein activation cascade	4/326	28/18862	0.00129243	0.0118262	0.00855397	FBLN1/SERPING1/F13A1/A2M	4
BP	GO:0072378	blood coagulation, fibrin clot formation	4/326	28/18862	0.00129243	0.0118262	0.00855397	FBLN1/SERPING1/F13A1/A2M	4
BP	GO:0010522	regulation of calcium ion transport into cytosol	7/326	95/18862	0.00130133	0.0118764	0.00859024	THY1/PKD2/CAV1/PLN/CASQ2/ATP1A2/JPH2	7
BP	GO:0045123	cellular extravasation	6/326	70/18862	0.00131835	0.0120001	0.00867973	JAM3/THY1/JAM2/CXCL12/CCL2/CCL21	6
BP	GO:0031960	response to corticosteroid	9/326	152/18862	0.00133274	0.0120993	0.00875147	SPARC/IGFBP7/SERPINF1/SLIT2/FIBIN/COL1A1/SLIT3/FBXO32/KLF9	9
BP	GO:0001736	establishment of planar polarity	8/326	123/18862	0.00134742	0.0121373	0.00877894	SFRP2/DACT1/ROR2/RSPO3/PRICKLE2/PRICKLE1/SFRP1/CTHRC1	8
BP	GO:0007164	establishment of tissue polarity	8/326	123/18862	0.00134742	0.0121373	0.00877894	SFRP2/DACT1/ROR2/RSPO3/PRICKLE2/PRICKLE1/SFRP1/CTHRC1	8
BP	GO:0042476	odontogenesis	8/326	123/18862	0.00134742	0.0121373	0.00877894	TGFB3/COL1A2/HTRA1/COL1A1/TNC/FAM20C/HAND2/PDGFRA	8
BP	GO:0110149	regulation of biomineralization	7/326	96/18862	0.00138331	0.0124183	0.00898219	DDR2/TGFB3/OMD/GREM1/MGP/TMEM119/COMP	7
BP	GO:0030195	negative regulation of blood coagulation	5/326	48/18862	0.00139294	0.0124183	0.00898219	FAP/THBS1/SERPING1/PDGFRA/SERPINE2	5
BP	GO:0033628	regulation of cell adhesion mediated by integrin	5/326	48/18862	0.00139294	0.0124183	0.00898219	SFRP2/JAM3/CYP1B1/SNAI2/CCL21	5
BP	GO:2001238	positive regulation of extrinsic apoptotic signaling pathway	5/326	48/18862	0.00139294	0.0124183	0.00898219	TIMP3/THBS1/SRPX/SFRP1/CAV1	5
BP	GO:0050818	regulation of coagulation	6/326	71/18862	0.00141949	0.0126225	0.00912993	FAP/THBS1/SERPING1/CAV1/PDGFRA/SERPINE2	6
BP	GO:0002063	chondrocyte development	4/326	29/18862	0.00147901	0.0130847	0.00946424	SFRP2/SULF1/COMP/COL11A1	4
BP	GO:0036296	response to increased oxygen levels	4/326	29/18862	0.00147901	0.0130847	0.00946424	PDGFRB/COL1A1/CAV1/PDPN	4
BP	GO:0032413	negative regulation of ion transmembrane transporter activity	6/326	72/18862	0.00152644	0.0134699	0.00974285	PKD2/GEM/CAV1/PLN/CASQ2/ATP1A2	6
BP	GO:0036293	response to decreased oxygen levels	15/326	360/18862	0.00158403	0.0139427	0.0100848	TGFB3/EDNRA/VEGFC/THBS1/PTGIS/MMP2/CRYAB/CXCL12/TEK/POSTN/SFRP1/KCNMB1/SOD3/CAV1/KCNMA1	15
BP	GO:0003214	cardiac left ventricle morphogenesis	3/326	14/18862	0.0016164	0.0140142	0.0101365	SFRP2/FOXF1/CPE	3
BP	GO:0030207	chondroitin sulfate catabolic process	3/326	14/18862	0.0016164	0.0140142	0.0101365	DCN/BGN/VCAN	3
BP	GO:0035791	platelet-derived growth factor receptor-beta signaling pathway	3/326	14/18862	0.0016164	0.0140142	0.0101365	PDGFRB/PDGFRL/LOX	3
BP	GO:0042249	establishment of planar polarity of embryonic epithelium	3/326	14/18862	0.0016164	0.0140142	0.0101365	SFRP2/SFRP1/CTHRC1	3
BP	GO:0086103	G protein-coupled receptor signaling pathway involved in heart process	3/326	14/18862	0.0016164	0.0140142	0.0101365	CAV1/ATP2B4/PLN	3
BP	GO:1905049	negative regulation of metallopeptidase activity	3/326	14/18862	0.0016164	0.0140142	0.0101365	TIMP2/TIMP3/RECK	3
BP	GO:0043687	post-translational protein modification	15/326	361/18862	0.00162747	0.014075	0.0101805	FSTL1/FBN1/IGFBP7/SPARCL1/VCAN/MXRA8/LGALS1/IGFBP4/IGFBP5/TNC/FAM20C/PRSS23/FBXO32/CHRDL1/C3	15
BP	GO:0060538	skeletal muscle organ development	9/326	157/18862	0.00166806	0.0143808	0.0104017	DCN/HEYL/TCF21/ELN/MEOX2/SVIL/CAV1/POPDC2/SMYD1	9
BP	GO:0045668	negative regulation of osteoblast differentiation	5/326	50/18862	0.00167586	0.0143808	0.0104017	VEGFC/GREM1/IGFBP5/SFRP1/HAND2	5
BP	GO:0048260	positive regulation of receptor-mediated endocytosis	5/326	50/18862	0.00167586	0.0143808	0.0104017	SFRP4/GREM1/C3/CCL21/CCL19	5
BP	GO:0034694	response to prostaglandin	4/326	30/18862	0.00168356	0.0143808	0.0104017	TNC/SFRP1/CCL21/CCL19	4
BP	GO:0051491	positive regulation of filopodium assembly	4/326	30/18862	0.00168356	0.0143808	0.0104017	TGFB3/DPYSL3/PALM/CCL21	4
BP	GO:1903522	regulation of blood circulation	13/326	290/18862	0.00168795	0.0143828	0.0104032	FXYD6/RGS4/CACNA1H/HSPB7/CAV1/ATP2B4/TPM1/PLN/CASQ2/POPDC2/DES/ATP1A2/FLNA	13
BP	GO:0030203	glycosaminoglycan metabolic process	9/326	158/18862	0.0017426	0.0148121	0.0107137	DCN/BGN/PDGFRB/LUM/OMD/VCAN/OGN/PRELP/FMOD	9
BP	GO:0043266	regulation of potassium ion transport	7/326	100/18862	0.00175234	0.0148585	0.0107472	RGS4/KCNMB1/FHL1/CAV1/CASQ2/FLNA/VIP	7
BP	GO:0019216	regulation of lipid metabolic process	16/326	402/18862	0.00178917	0.0151337	0.0109463	IGFBP7/PDGFRB/PRKD1/RARRES2/DKK3/TEK/SNAI2/GLIPR1/CAV1/SORBS1/PDGFRA/APOD/C3/CCL21/CCL19/PDK4	16
BP	GO:0010718	positive regulation of epithelial to mesenchymal transition	5/326	51/18862	0.00183212	0.0154219	0.0111547	TGFB3/FERMT2/TGFB1I1/COL1A1/PDPN	5
BP	GO:0046850	regulation of bone remodeling	5/326	51/18862	0.00183212	0.0154219	0.0111547	GREM1/TMEM119/SFRP1/CSF1R/PDK4	5
BP	GO:0014812	muscle cell migration	7/326	101/18862	0.00185555	0.0155492	0.0112468	PDGFRB/SLIT2/THBS4/IGFBP5/POSTN/TPM1/ADAMTS1	7
BP	GO:0016485	protein processing	11/326	224/18862	0.00185621	0.0155492	0.0112468	GAS1/C1R/THBS1/SPON1/CPXM2/ADAMTS2/CPXM1/CPE/SERPINE2/COMP/CTSG	11
BP	GO:0003382	epithelial cell morphogenesis	4/326	31/18862	0.00190696	0.0159357	0.0115264	COL15A1/HEG1/PALLD/CLIC4	4
BP	GO:0043200	response to amino acid	7/326	102/18862	0.0019634	0.0162719	0.0117696	COL1A2/COL5A2/MMP2/COL6A1/COL1A1/COL16A1/PDGFRA	7
BP	GO:0010763	positive regulation of fibroblast migration	3/326	15/18862	0.00199479	0.0162719	0.0117696	DDR2/THBS1/AKAP12	3
BP	GO:0038065	collagen-activated signaling pathway	3/326	15/18862	0.00199479	0.0162719	0.0117696	DDR2/COL1A1/ITGA11	3
BP	GO:0050651	dermatan sulfate proteoglycan biosynthetic process	3/326	15/18862	0.00199479	0.0162719	0.0117696	DCN/BGN/VCAN	3
BP	GO:0051770	positive regulation of nitric-oxide synthase biosynthetic process	3/326	15/18862	0.00199479	0.0162719	0.0117696	IL33/CCL2/AKAP12	3
BP	GO:0060766	negative regulation of androgen receptor signaling pathway	3/326	15/18862	0.00199479	0.0162719	0.0117696	HEYL/SFRP1/TCF21	3
BP	GO:0072075	metanephric mesenchyme development	3/326	15/18862	0.00199479	0.0162719	0.0117696	PDGFRB/PKD2/TCF21	3
BP	GO:0072224	metanephric glomerulus development	3/326	15/18862	0.00199479	0.0162719	0.0117696	PDGFRB/TCF21/PDGFRA	3
BP	GO:2001044	regulation of integrin-mediated signaling pathway	3/326	15/18862	0.00199479	0.0162719	0.0117696	PRKD1/LIMS2/FLNA	3
BP	GO:0044272	sulfur compound biosynthetic process	10/326	193/18862	0.00199798	0.0162719	0.0117696	DCN/BGN/LUM/OMD/GGT5/VCAN/OGN/PRELP/FMOD/PDK4	10
BP	GO:0050819	negative regulation of coagulation	5/326	52/18862	0.0019988	0.0162719	0.0117696	FAP/THBS1/SERPING1/PDGFRA/SERPINE2	5
BP	GO:0051279	regulation of release of sequestered calcium ion into cytosol	6/326	76/18862	0.00201665	0.0163788	0.0118468	THY1/PKD2/PLN/CASQ2/ATP1A2/JPH2	6
BP	GO:0030593	neutrophil chemotaxis	7/326	103/18862	0.00207605	0.0167826	0.012139	JAM3/SLIT2/THBS4/CCL2/CCL21/CCL19/CCL20	7
BP	GO:0031532	actin cytoskeleton reorganization	7/326	103/18862	0.00207605	0.0167826	0.012139	ANTXR1/SYDE1/TEK/FGF7/PDGFRA/CSF1R/FLNA	7
BP	GO:0030001	metal ion transport	18/326	486/18862	0.00209832	0.0169232	0.0122407	PDGFRB/THY1/PKD2/GEM/MYLK/CXCL12/RGS4/SLC24A3/CACNA1H/CAV1/ATP2B4/PLN/CASQ2/CCL2/ATP1A2/JPH2/CCL21/CCL19	18
BP	GO:0010595	positive regulation of endothelial cell migration	8/326	132/18862	0.00210898	0.0169304	0.0122459	SPARC/VEGFC/PRKD1/THBS1/RHOJ/SRPX2/TEK/SMOC2	8
BP	GO:0010977	negative regulation of neuron projection development	8/326	132/18862	0.00210898	0.0169304	0.0122459	DPYSL3/SPOCK1/VIM/THY1/LGALS1/RGMA/NR2F1/FLNA	8
BP	GO:0048048	embryonic eye morphogenesis	4/326	32/18862	0.00215006	0.0171806	0.0124268	FBN1/MFAP5/EFEMP1/ALDH1A3	4
BP	GO:0070570	regulation of neuron projection regeneration	4/326	32/18862	0.00215006	0.0171806	0.0124268	PRRX1/THY1/RGMA/FLNA	4
BP	GO:0003198	epithelial to mesenchymal transition involved in endocardial cushion formation	3/326	16/18862	0.00242391	0.0191714	0.0138668	HEYL/SNAI2/TMEM100	3
BP	GO:0050655	dermatan sulfate proteoglycan metabolic process	3/326	16/18862	0.00242391	0.0191714	0.0138668	DCN/BGN/VCAN	3
BP	GO:0060026	convergent extension	3/326	16/18862	0.00242391	0.0191714	0.0138668	SFRP2/SFRP1/FRZB	3
BP	GO:1905153	regulation of membrane invagination	3/326	16/18862	0.00242391	0.0191714	0.0138668	RAB31/SYT11/C3	3
BP	GO:0051384	response to glucocorticoid	8/326	135/18862	0.00242683	0.0191714	0.0138668	SPARC/IGFBP7/SERPINF1/SLIT2/FIBIN/SLIT3/FBXO32/KLF9	8
BP	GO:0097305	response to alcohol	11/326	233/18862	0.00252318	0.0198872	0.0143845	SPARC/IGFBP7/SLIT2/RGS4/TNC/SFRP1/SLIT3/KCNMB1/KLF9/CCL21/CCL19	11
BP	GO:0048736	appendage development	9/326	167/18862	0.00254072	0.0199349	0.014419	PRRX1/SFRP2/FERMT2/GREM1/RECK/ROR2/MEOX2/HAND2/COMP	9
BP	GO:0060173	limb development	9/326	167/18862	0.00254072	0.0199349	0.014419	PRRX1/SFRP2/FERMT2/GREM1/RECK/ROR2/MEOX2/HAND2/COMP	9
BP	GO:0050866	negative regulation of cell activation	10/326	200/18862	0.00258998	0.0202755	0.0146654	LRRC32/EMILIN1/SYT11/AXL/SFRP1/GPNMB/FOXF1/PDGFRA/SERPINE2/FGL2	10
BP	GO:0022604	regulation of cell morphogenesis	13/326	305/18862	0.0026213	0.0204745	0.0148093	SPARC/FERMT2/FBLN1/RHOJ/POSTN/LIMS2/PDPN/MYH10/TPM1/PALM/CSF1R/CCL2/FLNA	13
BP	GO:0031668	cellular response to extracellular stimulus	11/326	235/18862	0.00269495	0.0209382	0.0151447	SFRP2/PRKD1/AXL/MN1/COL1A1/TNC/KANK2/SNAI2/POSTN/SFRP1/PDK4	11
BP	GO:0002691	regulation of cellular extravasation	4/326	34/18862	0.00269879	0.0209382	0.0151447	JAM3/THY1/CXCL12/CCL21	4
BP	GO:0043276	anoikis	4/326	34/18862	0.00269879	0.0209382	0.0151447	SNAI2/ITGA5/CAV1/PDK4	4
BP	GO:0043583	ear development	10/326	202/18862	0.0027827	0.0215232	0.0155678	SPARC/PRRX1/TGFB3/PDGFRB/ROR2/MAFB/CTHRC1/ALDH1A3/FRZB/COL11A1	10
BP	GO:0014910	regulation of smooth muscle cell migration	6/326	81/18862	0.00278659	0.0215232	0.0155678	PDGFRB/SLIT2/IGFBP5/POSTN/TPM1/ADAMTS1	6
BP	GO:0035637	multicellular organismal signaling	10/326	203/18862	0.00288327	0.0221622	0.01603	JAM3/FXYD6/CNTNAP1/CACNA1H/CAV1/ATP2B4/PLN/CASQ2/ATP1A2/FLNA	10
BP	GO:1902905	positive regulation of supramolecular fiber organization	10/326	203/18862	0.00288327	0.0221622	0.01603	TGFB3/EFEMP2/FERMT2/SFRP1/MAP1B/LMOD1/TPM1/SYNPO2/FLNA/CCL21	10
BP	GO:0010715	regulation of extracellular matrix disassembly	3/326	17/18862	0.00290592	0.0221622	0.01603	DDR2/FAP/PDPN	3
BP	GO:0010759	positive regulation of macrophage chemotaxis	3/326	17/18862	0.00290592	0.0221622	0.01603	RARRES2/THBS1/CSF1R	3
BP	GO:0043116	negative regulation of vascular permeability	3/326	17/18862	0.00290592	0.0221622	0.01603	SLIT2/FERMT2/AKAP12	3
BP	GO:0031333	negative regulation of protein-containing complex assembly	8/326	139/18862	0.00290767	0.0221622	0.01603	JAM3/SLIT2/CLIP3/DACT1/CRYAB/LMOD1/SVIL/TMOD1	8
BP	GO:0001656	metanephros development	6/326	82/18862	0.00296383	0.0224914	0.0162681	FBN1/PDGFRB/GREM1/PKD2/TCF21/PDGFRA	6
BP	GO:0032410	negative regulation of transporter activity	6/326	82/18862	0.00296383	0.0224914	0.0162681	PKD2/GEM/CAV1/PLN/CASQ2/ATP1A2	6
BP	GO:0032387	negative regulation of intracellular transport	5/326	57/18862	0.0030024	0.02265	0.0163829	CRYAB/RAB23/MAP1B/PLN/APOD	5
BP	GO:0048008	platelet-derived growth factor receptor signaling pathway	5/326	57/18862	0.0030024	0.02265	0.0163829	PDGFRB/PDGFRL/LOX/PDGFRA/APOD	5
BP	GO:0033144	negative regulation of intracellular steroid hormone receptor signaling pathway	4/326	35/18862	0.00300609	0.02265	0.0163829	HEYL/KANK2/SFRP1/TCF21	4
BP	GO:0042471	ear morphogenesis	7/326	110/18862	0.00301086	0.02265	0.0163829	PRRX1/ROR2/MAFB/CTHRC1/ALDH1A3/FRZB/COL11A1	7
BP	GO:0006022	aminoglycan metabolic process	9/326	172/18862	0.00309552	0.0232365	0.0168071	DCN/BGN/PDGFRB/LUM/OMD/VCAN/OGN/PRELP/FMOD	9
BP	GO:1901019	regulation of calcium ion transmembrane transporter activity	6/326	83/18862	0.00314936	0.0235896	0.0170624	PKD2/GEM/PLN/CASQ2/ATP1A2/JPH2	6
BP	GO:1903959	regulation of anion transmembrane transport	7/326	111/18862	0.00316706	0.0236711	0.0171214	EDNRA/CLIP3/THBS1/RGS4/SORBS1/ATP1A2/C3	7
BP	GO:0002011	morphogenesis of an epithelial sheet	5/326	58/18862	0.00324	0.0241641	0.017478	FERMT2/COL5A1/ITGA5/PDPN/FLNA	5
BP	GO:0014741	negative regulation of muscle hypertrophy	4/326	36/18862	0.00333646	0.0247227	0.0178821	IGFBP5/RGS4/ATP2B4/PI16	4
BP	GO:0043267	negative regulation of potassium ion transport	4/326	36/18862	0.00333646	0.0247227	0.0178821	RGS4/CAV1/CASQ2/VIP	4
BP	GO:1902742	apoptotic process involved in development	4/326	36/18862	0.00333646	0.0247227	0.0178821	SLIT2/CRYAB/SLIT3/HAND2	4
BP	GO:0061053	somite development	6/326	84/18862	0.00334341	0.0247227	0.0178821	SFRP2/ROR2/SFRP1/MEOX2/FOXF1/FRZB	6
BP	GO:0006704	glucocorticoid biosynthetic process	3/326	18/18862	0.00344284	0.0251894	0.0182196	DKK3/CACNA1H/HSD11B1	3
BP	GO:0045019	negative regulation of nitric oxide biosynthetic process	3/326	18/18862	0.00344284	0.0251894	0.0182196	PTGIS/CAV1/ATP2B4	3
BP	GO:0046851	negative regulation of bone remodeling	3/326	18/18862	0.00344284	0.0251894	0.0182196	GREM1/TMEM119/SFRP1	3
BP	GO:0060973	cell migration involved in heart development	3/326	18/18862	0.00344284	0.0251894	0.0182196	PDGFRB/SNAI2/HAND2	3
BP	GO:1904406	negative regulation of nitric oxide metabolic process	3/326	18/18862	0.00344284	0.0251894	0.0182196	PTGIS/CAV1/ATP2B4	3
BP	GO:0010634	positive regulation of epithelial cell migration	9/326	175/18862	0.00347166	0.0252935	0.0182949	SPARC/VEGFC/PRKD1/THBS1/RHOJ/SRPX2/TEK/FGF7/SMOC2	9
BP	GO:0043534	blood vessel endothelial cell migration	9/326	175/18862	0.00347166	0.0252935	0.0182949	SLIT2/VEGFC/PRKD1/GREM1/THBS1/RHOJ/SRPX2/MEOX2/ATP2B4	9
BP	GO:0006940	regulation of smooth muscle contraction	5/326	59/18862	0.00349085	0.02538	0.0183575	CNN1/CAV1/KCNMA1/ATP1A2/TACR2	5
BP	GO:0051651	maintenance of location in cell	10/326	209/18862	0.00354931	0.025751	0.0186258	THY1/PKD2/CAV1/PLN/CASQ2/ATP1A2/JPH2/CCL21/CCL19/LCN2	10
BP	GO:0035051	cardiocyte differentiation	8/326	144/18862	0.00360966	0.0261343	0.018903	PDGFRB/GREM1/RGS4/PRICKLE1/MYH11/HAND2/PDGFRA/PI16	8
BP	GO:0010837	regulation of keratinocyte proliferation	4/326	37/18862	0.0036907	0.0265547	0.0192071	PRKD1/SNAI2/FGF7/KLF9	4
BP	GO:1903115	regulation of actin filament-based movement	4/326	37/18862	0.0036907	0.0265547	0.0192071	CAV1/PDPN/PLN/ATP1A2	4
BP	GO:2000403	positive regulation of lymphocyte migration	4/326	37/18862	0.0036907	0.0265547	0.0192071	JAM2/CXCL12/CCL21/CCL20	4
BP	GO:0008217	regulation of blood pressure	9/326	177/18862	0.00374175	0.0266985	0.0193112	EDNRA/COL1A2/VEGFC/ACTA2/RARRES2/POSTN/TPM1/ATP1A2/CTSG	9
BP	GO:0051926	negative regulation of calcium ion transport	5/326	60/18862	0.00375535	0.0266985	0.0193112	PKD2/GEM/PLN/CASQ2/ATP1A2	5
BP	GO:0030512	negative regulation of transforming growth factor beta receptor signaling pathway	6/326	86/18862	0.00375806	0.0266985	0.0193112	TGFB3/FBN1/EMILIN1/HTRA1/TGFB1I1/CAV1	6
BP	GO:0051952	regulation of amine transport	6/326	86/18862	0.00375806	0.0266985	0.0193112	SYT11/CXCL12/RGS4/ATP1A2/TACR2/VIP	6
BP	GO:1901379	regulation of potassium ion transmembrane transport	6/326	86/18862	0.00375806	0.0266985	0.0193112	RGS4/KCNMB1/FHL1/CAV1/CASQ2/FLNA	6
BP	GO:0001764	neuron migration	8/326	145/18862	0.00376458	0.0266985	0.0193112	COL3A1/NDN/SPOCK1/AXL/FLRT2/CXCL12/MAP1B/FLNA	8
BP	GO:0060041	retina development in camera-type eye	8/326	145/18862	0.00376458	0.0266985	0.0193112	PDGFRB/SERPINF1/THY1/CYP1B1/RHOJ/CLIC4/ATP2B4/PDGFRA	8
BP	GO:0051235	maintenance of location	13/326	319/18862	0.00383885	0.0271697	0.019652	FBN1/THY1/PKD2/CAV1/PLN/CASQ2/ATP1A2/FLNA/JPH2/C3/CCL21/CCL19/LCN2	13
BP	GO:0030449	regulation of complement activation	7/326	115/18862	0.00385458	0.0272255	0.0196923	C1S/C1R/SERPING1/C7/CFH/A2M/C3	7
BP	GO:0006956	complement activation	9/326	178/18862	0.00388283	0.0273692	0.0197963	C1S/C1R/SERPING1/MFAP4/C7/CFH/A2M/C3/CFD	9
BP	GO:0051896	regulation of protein kinase B signaling	11/326	247/18862	0.00393434	0.027676	0.0200182	PDGFRB/FERMT2/THBS1/AXL/IGFBP5/TEK/FGF7/PDGFRA/PHLDA3/CCL21/CCL19	11
BP	GO:0002689	negative regulation of leukocyte chemotaxis	3/326	19/18862	0.00403652	0.0281663	0.0203728	SLIT2/GREM1/CCL2	3
BP	GO:0007620	copulation	3/326	19/18862	0.00403652	0.0281663	0.0203728	SERPINE2/VIP/PI3	3
BP	GO:0035313	wound healing, spreading of epidermal cells	3/326	19/18862	0.00403652	0.0281663	0.0203728	FERMT2/COL5A1/ITGA5	3
BP	GO:0072074	kidney mesenchyme development	3/326	19/18862	0.00403652	0.0281663	0.0203728	PDGFRB/PKD2/TCF21	3
BP	GO:0010463	mesenchymal cell proliferation	4/326	38/18862	0.0040696	0.0281704	0.0203758	PRRX1/FGF7/FOXF1/HAND2	4
BP	GO:0048246	macrophage chemotaxis	4/326	38/18862	0.0040696	0.0281704	0.0203758	RARRES2/THBS1/CSF1R/CCL2	4
BP	GO:0048286	lung alveolus development	4/326	38/18862	0.0040696	0.0281704	0.0203758	TGFB3/IGFBP5/TCF21/FOXF1	4
BP	GO:1904706	negative regulation of vascular associated smooth muscle cell proliferation	4/326	38/18862	0.0040696	0.0281704	0.0203758	TGFB3/EFEMP2/CNN1/TPM1	4
BP	GO:0014909	smooth muscle cell migration	6/326	88/18862	0.00420968	0.029082	0.0210352	PDGFRB/SLIT2/IGFBP5/POSTN/TPM1/ADAMTS1	6
BP	GO:1905521	regulation of macrophage migration	4/326	39/18862	0.00447394	0.0308462	0.0223112	EMILIN1/RARRES2/THBS1/CSF1R	4
BP	GO:0045446	endothelial cell differentiation	7/326	119/18862	0.0046499	0.0318206	0.023016	FSTL1/COL15A1/HEG1/ZEB1/CLIC4/PDPN/TMEM100	7
BP	GO:0001502	cartilage condensation	3/326	20/18862	0.00468867	0.0318206	0.023016	MGP/ROR2/COL11A1	3
BP	GO:0034104	negative regulation of tissue remodeling	3/326	20/18862	0.00468867	0.0318206	0.023016	GREM1/TMEM119/SFRP1	3
BP	GO:0044342	type B pancreatic cell proliferation	3/326	20/18862	0.00468867	0.0318206	0.023016	IGFBP4/IGFBP5/SFRP1	3
BP	GO:0051767	nitric-oxide synthase biosynthetic process	3/326	20/18862	0.00468867	0.0318206	0.023016	IL33/CCL2/AKAP12	3
BP	GO:0051769	regulation of nitric-oxide synthase biosynthetic process	3/326	20/18862	0.00468867	0.0318206	0.023016	IL33/CCL2/AKAP12	3
BP	GO:0090280	positive regulation of calcium ion import	3/326	20/18862	0.00468867	0.0318206	0.023016	PDGFRB/CXCL12/CCL2	3
BP	GO:0150146	cell junction disassembly	3/326	20/18862	0.00468867	0.0318206	0.023016	TGFB3/SNAI2/C3	3
BP	GO:1903035	negative regulation of response to wounding	6/326	90/18862	0.00470019	0.0318364	0.0230274	FAP/THBS1/RGMA/SERPING1/PDGFRA/SERPINE2	6
BP	GO:0042445	hormone metabolic process	10/326	218/18862	0.00477147	0.0322563	0.0233311	CTSK/CYP1B1/DKK3/CACNA1H/GHR/ALDH1A3/PDGFRA/DIO2/CTSG/ADH1B	10
BP	GO:0060284	regulation of cell development	17/326	485/18862	0.00479932	0.0322935	0.023358	FBN1/SERPINF1/SLIT2/FERMT2/VEGFC/THY1/RECK/FBLN1/HEYL/GPR68/CXCL12/POSTN/MAP1B/LIMS2/FRZB/SERPINE2/FLNA	17
BP	GO:0007159	leukocyte cell-cell adhesion	14/326	366/18862	0.00480412	0.0322935	0.023358	LRRC32/THY1/LGALS1/JAM2/CXCL12/ITGA5/CERCAM/GPNMB/CAV1/CCL2/FGL2/OLR1/CCL21/CCL19	14
BP	GO:0008360	regulation of cell shape	8/326	151/18862	0.00480491	0.0322935	0.023358	FERMT2/RHOJ/PDPN/MYH10/TPM1/PALM/CSF1R/CCL2	8
BP	GO:1904037	positive regulation of epithelial cell apoptotic process	4/326	40/18862	0.00490448	0.0328989	0.023796	SFRP4/THBS1/CD248/CCL2	4
BP	GO:0048247	lymphocyte chemotaxis	5/326	64/18862	0.00495791	0.0331931	0.0240087	CH25H/CCL2/CCL21/CCL19/CCL20	5
BP	GO:0051495	positive regulation of cytoskeleton organization	10/326	220/18862	0.00508335	0.0339673	0.0245687	TGFB3/FERMT2/TEK/SFRP1/MAP1B/LMOD1/TPM1/SYNPO2/FLNA/CCL21	10
BP	GO:0001756	somitogenesis	5/326	65/18862	0.00529669	0.0353249	0.0255507	SFRP2/ROR2/SFRP1/MEOX2/FOXF1	5
BP	GO:0030850	prostate gland development	4/326	41/18862	0.00536197	0.0356916	0.0258159	SERPINF1/SULF1/TNC/SFRP1	4
BP	GO:0048745	smooth muscle tissue development	3/326	21/18862	0.00540086	0.0358816	0.0259533	EFEMP2/PKD2/MYLK	3
BP	GO:0002042	cell migration involved in sprouting angiogenesis	6/326	93/18862	0.00551307	0.0365304	0.0264226	SLIT2/GREM1/THBS1/RHOJ/SRPX2/MEOX2	6
BP	GO:0071900	regulation of protein serine/threonine kinase activity	17/326	492/18862	0.00551959	0.0365304	0.0264226	TGFB3/SFRP2/PDGFRB/FERMT2/HEG1/THY1/THBS1/PKD2/ROR2/IGFBP6/RGS4/SFRP1/GHR/CAV1/ATP2B4/CSF1R/CCL19	17
BP	GO:1990266	neutrophil migration	7/326	123/18862	0.00556312	0.0367484	0.0265803	JAM3/SLIT2/THBS4/CCL2/CCL21/CCL19/CCL20	7
BP	GO:0072678	T cell migration	5/326	66/18862	0.00565153	0.0372614	0.0269514	CXCL12/CCL2/APOD/CCL21/CCL20	5
BP	GO:0010769	regulation of cell morphogenesis involved in differentiation	6/326	94/18862	0.00580556	0.038132	0.0275811	FERMT2/FBLN1/POSTN/LIMS2/PDPN/FLNA	6
BP	GO:0015837	amine transport	6/326	94/18862	0.00580556	0.038132	0.0275811	SYT11/CXCL12/RGS4/ATP1A2/TACR2/VIP	6
BP	GO:0003197	endocardial cushion development	4/326	42/18862	0.00584713	0.0382601	0.0276737	HEYL/SNAI2/FOXF1/TMEM100	4
BP	GO:0032965	regulation of collagen biosynthetic process	4/326	42/18862	0.00584713	0.0382601	0.0276737	TGFB3/PDGFRB/EMILIN1/VIM	4
BP	GO:0034394	protein localization to cell surface	5/326	67/18862	0.00602281	0.0392615	0.028398	JAM3/MAP1A/FBLN5/FGF7/FLNA	5
BP	GO:0060415	muscle tissue morphogenesis	5/326	67/18862	0.00602281	0.0392615	0.028398	EFEMP2/HEG1/MYLK/TPM1/COL11A1	5
BP	GO:0002698	negative regulation of immune effector process	7/326	125/18862	0.00606715	0.0394024	0.0284999	TGFB3/HTRA1/SERPING1/FOXF1/IL33/A2M/FGL2	7
BP	GO:0032355	response to estradiol	7/326	125/18862	0.00606715	0.0394024	0.0284999	PDGFRB/GGT5/CRYAB/COL1A1/POSTN/SFRP1/MAP1B	7
BP	GO:0007548	sex differentiation	11/326	262/18862	0.00608201	0.039425	0.0285163	SFRP2/PDGFRB/SLIT2/AXL/ROR2/SFRP1/SLIT3/TCF21/PDGFRA/ADAMTS1/FLNA	11
BP	GO:0035282	segmentation	6/326	95/18862	0.00610922	0.0394962	0.0285678	SFRP2/ROR2/MAFB/SFRP1/MEOX2/FOXF1	6
BP	GO:0046777	protein autophosphorylation	10/326	226/18862	0.00611576	0.0394962	0.0285678	DDR2/PDGFRB/VEGFC/PRKD1/GREM1/TEK/GPNMB/CAV1/PDGFRA/CSF1R	10
BP	GO:0010881	regulation of cardiac muscle contraction by regulation of the release of sequestered calcium ion	3/326	22/18862	0.00617453	0.0398016	0.0287887	PLN/CASQ2/ATP1A2	3
BP	GO:2000377	regulation of reactive oxygen species metabolic process	9/326	192/18862	0.0063298	0.0407268	0.0294579	PDGFRB/THBS1/PKD2/CYP1B1/PTGIS/CRYAB/FBLN5/CAV1/ATP2B4	9
BP	GO:2000404	regulation of T cell migration	4/326	43/18862	0.00636068	0.0408497	0.0295468	CXCL12/APOD/CCL21/CCL20	4
BP	GO:0048010	vascular endothelial growth factor receptor signaling pathway	6/326	96/18862	0.00642428	0.0411059	0.0297321	EMILIN1/VEGFC/PRKD1/AXL/SULF1/ITGA5	6
BP	GO:0048661	positive regulation of smooth muscle cell proliferation	6/326	96/18862	0.00642428	0.0411059	0.0297321	PDGFRB/THBS1/MMP2/IGFBP5/ADAMTS1/RBPMS2	6
BP	GO:0034614	cellular response to reactive oxygen species	8/326	159/18862	0.00651904	0.0415589	0.0300598	PKD2/AXL/CYP1B1/MMP2/FBLN5/SOD3/TPM1/PDGFRA	8
BP	GO:0051147	regulation of muscle cell differentiation	8/326	159/18862	0.00651904	0.0415589	0.0300598	EFEMP2/GREM1/TMEM119/BOC/RGS4/RBPMS2/PI16/SMYD1	8
BP	GO:0006959	humoral immune response	14/326	380/18862	0.0066235	0.0421473	0.0304854	C1S/C1R/RARRES2/SERPING1/MFAP4/C7/CFH/CCL2/A2M/CTSG/C3/CFD/LCN2/PI3	14
BP	GO:0071496	cellular response to external stimulus	12/326	303/18862	0.00670022	0.0425574	0.030782	SFRP2/PRKD1/AXL/MN1/COL1A1/TNC/KANK2/SNAI2/POSTN/SFRP1/ATP1A2/PDK4	12
BP	GO:0002027	regulation of heart rate	6/326	97/18862	0.00675098	0.0426456	0.0308457	RGS4/CAV1/TPM1/PLN/CASQ2/POPDC2	6
BP	GO:0010596	negative regulation of endothelial cell migration	6/326	97/18862	0.00675098	0.0426456	0.0308457	DCN/SERPINF1/SLIT2/THBS1/MEOX2/ATP2B4	6
BP	GO:0043502	regulation of muscle adaptation	6/326	97/18862	0.00675098	0.0426456	0.0308457	IGFBP5/RGS4/FBXO32/ATP2B4/HAND2/PI16	6
BP	GO:0051966	regulation of synaptic transmission, glutamatergic	5/326	69/18862	0.00681623	0.0429795	0.0310872	TSHZ3/ROR2/CCL2/SERPINE2/ATP1A2	5
BP	GO:0070588	calcium ion transmembrane transport	12/326	304/18862	0.00687085	0.0432452	0.0312795	THY1/PKD2/GEM/SLC24A3/CACNA1H/ATP2B4/PLN/CASQ2/ATP1A2/JPH2/CCL21/CCL19	12
BP	GO:1902806	regulation of cell cycle G1/S phase transition	9/326	195/18862	0.00698176	0.0435805	0.031522	DACT1/PKD2/MN1/KANK2/GPNMB/FHL1/ATP2B4/ADAMTS1/CCL2	9
BP	GO:0003416	endochondral bone growth	3/326	23/18862	0.00701096	0.0435805	0.031522	DDR2/BNC2/COMP	3
BP	GO:0032331	negative regulation of chondrocyte differentiation	3/326	23/18862	0.00701096	0.0435805	0.031522	GREM1/EFEMP1/SNAI2	3
BP	GO:0034695	response to prostaglandin E	3/326	23/18862	0.00701096	0.0435805	0.031522	SFRP1/CCL21/CCL19	3
BP	GO:0098743	cell aggregation	3/326	23/18862	0.00701096	0.0435805	0.031522	MGP/ROR2/COL11A1	3
BP	GO:2000353	positive regulation of endothelial cell apoptotic process	3/326	23/18862	0.00701096	0.0435805	0.031522	THBS1/CD248/CCL2	3
BP	GO:1902904	negative regulation of supramolecular fiber organization	8/326	161/18862	0.00701209	0.0435805	0.031522	EMILIN1/SLIT2/CLIP3/CRYAB/MAP1B/LMOD1/SVIL/TMOD1	8
BP	GO:0031346	positive regulation of cell projection organization	13/326	344/18862	0.00712705	0.0442158	0.0319815	TGFB3/DPYSL3/SERPINF1/SLIT2/PRKD1/ROR2/CXCL12/MAP1B/EPHA3/PALM/FLNA/CCL21/CCL19	13
BP	GO:0001974	blood vessel remodeling	4/326	45/18862	0.00747564	0.046213	0.0334261	BGN/AXL/RSPO3/FLNA	4
BP	GO:0014911	positive regulation of smooth muscle cell migration	4/326	45/18862	0.00747564	0.046213	0.0334261	PDGFRB/IGFBP5/POSTN/ADAMTS1	4
BP	GO:0014743	regulation of muscle hypertrophy	5/326	71/18862	0.00768003	0.0472484	0.034175	IGFBP5/RGS4/ATP2B4/HAND2/PI16	5
BP	GO:0043627	response to estrogen	5/326	71/18862	0.00768003	0.0472484	0.034175	TGFB3/PDGFRB/TEK/SFRP1/CAV1	5
BP	GO:1901136	carbohydrate derivative catabolic process	9/326	198/18862	0.007684	0.0472484	0.034175	DCN/BGN/LUM/OMD/VCAN/PDE1A/OGN/PRELP/FMOD	9
BP	GO:0007224	smoothened signaling pathway	7/326	131/18862	0.00778438	0.0476965	0.0344991	GAS1/PRRX1/BOC/ROR2/SFRP1/FOXF1/SERPINE2	7
BP	GO:0072073	kidney epithelium development	7/326	131/18862	0.00778438	0.0476965	0.0344991	SLIT2/GREM1/PKD2/HEYL/KANK2/SFRP1/TCF21	7
BP	GO:0003272	endocardial cushion formation	3/326	24/18862	0.00791136	0.0478824	0.0346335	HEYL/SNAI2/TMEM100	3
BP	GO:0006929	substrate-dependent cell migration	3/326	24/18862	0.00791136	0.0478824	0.0346335	SLIT2/VEGFC/ITGA11	3
BP	GO:0010560	positive regulation of glycoprotein biosynthetic process	3/326	24/18862	0.00791136	0.0478824	0.0346335	IL33/CCL21/CCL19	3
BP	GO:0014829	vascular associated smooth muscle contraction	3/326	24/18862	0.00791136	0.0478824	0.0346335	EDNRA/ACTA2/COMP	3
BP	GO:0090023	positive regulation of neutrophil chemotaxis	3/326	24/18862	0.00791136	0.0478824	0.0346335	THBS4/CCL21/CCL19	3
BP	GO:1905523	positive regulation of macrophage migration	3/326	24/18862	0.00791136	0.0478824	0.0346335	RARRES2/THBS1/CSF1R	3
BP	GO:2001026	regulation of endothelial cell chemotaxis	3/326	24/18862	0.00791136	0.0478824	0.0346335	PRKD1/THBS1/SMOC2	3
BP	GO:0007204	positive regulation of cytosolic calcium ion concentration	12/326	310/18862	0.00796789	0.0481405	0.0348202	EDNRA/THY1/PKD2/CAV1/ATP2B4/PDGFRA/PLN/CASQ2/ATP1A2/JPH2/CCL21/CCL19	12
BP	GO:0008038	neuron recognition	4/326	46/18862	0.00807838	0.0484703	0.0350588	NDN/PALLD/NEXN/EPHA3	4
BP	GO:0051489	regulation of filopodium assembly	4/326	46/18862	0.00807838	0.0484703	0.0350588	TGFB3/DPYSL3/PALM/CCL21	4
BP	GO:2000107	negative regulation of leukocyte apoptotic process	4/326	46/18862	0.00807838	0.0484703	0.0350588	AXL/CXCL12/CCL21/CCL19	4
BP	GO:2001258	negative regulation of cation channel activity	4/326	46/18862	0.00807838	0.0484703	0.0350588	PKD2/GEM/CAV1/CASQ2	4
BP	GO:0086003	cardiac muscle cell contraction	5/326	72/18862	0.00813926	0.0486671	0.0352012	KCNJ8/CAV1/PLN/ATP1A2/FLNA	5
BP	GO:1903036	positive regulation of response to wounding	5/326	72/18862	0.00813926	0.0486671	0.0352012	FERMT2/THBS1/MYLK/SMOC2/FLNA	5
BP	GO:0035265	organ growth	8/326	166/18862	0.00836782	0.0499477	0.0361274	DDR2/BNC2/PDGFRB/HEG1/RGS4/FGF7/COMP/PI16	8
BP	GO:0032231	regulation of actin filament bundle assembly	6/326	102/18862	0.00856746	0.0510514	0.0369257	TGFB3/FERMT2/SFRP1/TPM1/SYNPO2/FLNA	6
BP	GO:0006809	nitric oxide biosynthetic process	5/326	73/18862	0.00861719	0.0511719	0.0370129	PKD2/CYP1B1/PTGIS/CAV1/ATP2B4	5
BP	GO:0048644	muscle organ morphogenesis	5/326	73/18862	0.00861719	0.0511719	0.0370129	EFEMP2/HEG1/MYLK/TPM1/COL11A1	5
BP	GO:0031952	regulation of protein autophosphorylation	4/326	47/18862	0.00871213	0.0516473	0.0373567	VEGFC/GREM1/GPNMB/CAV1	4
BP	GO:0007266	Rho protein signal transduction	7/326	134/18862	0.0087664	0.0518804	0.0375253	COL3A1/PDGFRB/COL1A2/HEG1/RHOJ/KANK2/PDPN	7
BP	GO:0008211	glucocorticoid metabolic process	3/326	25/18862	0.00887677	0.052001	0.0376126	DKK3/CACNA1H/HSD11B1	3
BP	GO:0030206	chondroitin sulfate biosynthetic process	3/326	25/18862	0.00887677	0.052001	0.0376126	DCN/BGN/VCAN	3
BP	GO:0042730	fibrinolysis	3/326	25/18862	0.00887677	0.052001	0.0376126	FAP/THBS1/SERPING1	3
BP	GO:0060740	prostate gland epithelium morphogenesis	3/326	25/18862	0.00887677	0.052001	0.0376126	SULF1/TNC/SFRP1	3
BP	GO:0060765	regulation of androgen receptor signaling pathway	3/326	25/18862	0.00887677	0.052001	0.0376126	HEYL/SFRP1/TCF21	3
BP	GO:0072273	metanephric nephron morphogenesis	3/326	25/18862	0.00887677	0.052001	0.0376126	PDGFRB/GREM1/PKD2	3
BP	GO:0032526	response to retinoic acid	6/326	103/18862	0.00896899	0.0523858	0.0378909	IGFBP7/PDGFRB/SERPINF1/COL1A1/TNC/EPHA3	6
BP	GO:0050679	positive regulation of epithelial cell proliferation	9/326	203/18862	0.00897265	0.0523858	0.0378909	VEGFC/PRKD1/THBS4/HTRA1/CXCL12/TEK/FGF7/SFRP1/VIP	9
BP	GO:0060048	cardiac muscle contraction	7/326	135/18862	0.0091131	0.0530335	0.0383594	KCNJ8/CAV1/TPM1/PLN/CASQ2/ATP1A2/FLNA	7
BP	GO:0061045	negative regulation of wound healing	5/326	74/18862	0.00911418	0.0530335	0.0383594	FAP/THBS1/SERPING1/PDGFRA/SERPINE2	5
BP	GO:0044706	multi-multicellular organism process	9/326	204/18862	0.00924892	0.0537274	0.0388613	TGFB3/IGFBP7/SYDE1/RECK/MMP2/IGFBP5/ITGA5/COL16A1/SERPINE2	9
BP	GO:0002762	negative regulation of myeloid leukocyte differentiation	4/326	48/18862	0.00937751	0.0539685	0.0390357	FBN1/GPR68/MAFB/SFRP1	4
BP	GO:0043616	keratinocyte proliferation	4/326	48/18862	0.00937751	0.0539685	0.0390357	PRKD1/SNAI2/FGF7/KLF9	4
BP	GO:0060425	lung morphogenesis	4/326	48/18862	0.00937751	0.0539685	0.0390357	TNC/FGF7/TCF21/FOXF1	4
BP	GO:0060688	regulation of morphogenesis of a branching structure	4/326	48/18862	0.00937751	0.0539685	0.0390357	GREM1/SULF1/FGF7/SFRP1	4
BP	GO:0030038	contractile actin filament bundle assembly	6/326	104/18862	0.0093838	0.0539685	0.0390357	TGFB3/FERMT2/SFRP1/ELN/TPM1/SORBS1	6
BP	GO:0043149	stress fiber assembly	6/326	104/18862	0.0093838	0.0539685	0.0390357	TGFB3/FERMT2/SFRP1/ELN/TPM1/SORBS1	6
BP	GO:0045598	regulation of fat cell differentiation	7/326	136/18862	0.00946974	0.0543726	0.039328	SFRP2/FERMT2/RARRES2/TGFB1I1/SFRP1/FRZB/MMP11	7
BP	GO:0001937	negative regulation of endothelial cell proliferation	5/326	75/18862	0.0096306	0.0551138	0.039864	SPARC/THBS1/SULF1/CAV1/CCL2	5
BP	GO:0043536	positive regulation of blood vessel endothelial cell migration	5/326	75/18862	0.0096306	0.0551138	0.039864	VEGFC/PRKD1/THBS1/RHOJ/SRPX2	5
BP	GO:0003158	endothelium development	7/326	137/18862	0.00983648	0.0561992	0.0406492	FSTL1/COL15A1/HEG1/ZEB1/CLIC4/PDPN/TMEM100	7
BP	GO:0001945	lymph vessel development	3/326	26/18862	0.00990813	0.0562379	0.0406772	VEGFC/HEG1/PDPN	3
BP	GO:0032104	regulation of response to extracellular stimulus	3/326	26/18862	0.00990813	0.0562379	0.0406772	MN1/KANK2/SNAI2	3
BP	GO:0032107	regulation of response to nutrient levels	3/326	26/18862	0.00990813	0.0562379	0.0406772	MN1/KANK2/SNAI2	3
BP	GO:0098868	bone growth	3/326	26/18862	0.00990813	0.0562379	0.0406772	DDR2/BNC2/COMP	3
BP	GO:0072593	reactive oxygen species metabolic process	11/326	281/18862	0.0100186	0.0567722	0.0410636	PDGFRB/THBS1/PKD2/CYP1B1/PTGIS/CRYAB/FBLN5/SOD3/CAV1/ATP2B4/PDK4	11
BP	GO:0050982	detection of mechanical stimulus	4/326	49/18862	0.0100751	0.0569543	0.0411953	PKD2/CXCL12/SERPINE2/COL11A1	4
BP	GO:0034612	response to tumor necrosis factor	12/326	320/18862	0.0100966	0.0569543	0.0411953	CLIP3/GGT5/THBS1/COL1A1/POSTN/SFRP1/CCL2/AKAP12/FABP4/CCL21/CCL19/CCL20	12
BP	GO:0034764	positive regulation of transmembrane transport	9/326	207/18862	0.0101165	0.0569543	0.0411953	CLIP3/THY1/PKD2/KCNMB1/SORBS1/CCL2/FLNA/JPH2/C3	9
BP	GO:0034767	positive regulation of ion transmembrane transport	9/326	207/18862	0.0101165	0.0569543	0.0411953	CLIP3/THY1/PKD2/KCNMB1/SORBS1/CCL2/FLNA/JPH2/C3	9
BP	GO:0002920	regulation of humoral immune response	7/326	138/18862	0.0102135	0.0574074	0.0415231	C1S/C1R/SERPING1/C7/CFH/A2M/C3	7
BP	GO:0048259	regulation of receptor-mediated endocytosis	6/326	106/18862	0.0102542	0.0575431	0.0416212	SFRP4/GREM1/SYT11/C3/CCL21/CCL19	6
BP	GO:0042063	gliogenesis	11/326	283/18862	0.0105262	0.0589741	0.0426562	NDN/VIM/LAMA2/MXRA8/ROR2/CNTNAP1/TSPAN2/CSF1R/IL33/CCL2/SERPINE2	11
BP	GO:0046209	nitric oxide metabolic process	5/326	77/18862	0.0107231	0.0598837	0.0433141	PKD2/CYP1B1/PTGIS/CAV1/ATP2B4	5
BP	GO:0055013	cardiac muscle cell development	5/326	77/18862	0.0107231	0.0598837	0.0433141	PDGFRB/RGS4/MYH11/PDGFRA/PI16	5
BP	GO:0006979	response to oxidative stress	15/326	444/18862	0.0107442	0.0599048	0.0433295	MSRB3/PDGFRB/PRKD1/PKD2/AXL/CYP1B1/MMP2/CRYAB/COL1A1/FBLN5/SOD3/TPM1/PDGFRA/APOD/CCL19	15
BP	GO:0007566	embryo implantation	4/326	50/18862	0.0108055	0.0600153	0.0434094	IGFBP7/SYDE1/RECK/MMP2	4
BP	GO:0003401	axis elongation	3/326	27/18862	0.0110063	0.0600153	0.0434094	SFRP2/TNC/SFRP1	3
BP	GO:0010758	regulation of macrophage chemotaxis	3/326	27/18862	0.0110063	0.0600153	0.0434094	RARRES2/THBS1/CSF1R	3
BP	GO:0010882	regulation of cardiac muscle contraction by calcium ion signaling	3/326	27/18862	0.0110063	0.0600153	0.0434094	PLN/CASQ2/ATP1A2	3
BP	GO:0010955	negative regulation of protein processing	3/326	27/18862	0.0110063	0.0600153	0.0434094	GAS1/THBS1/SERPINE2	3
BP	GO:0031954	positive regulation of protein autophosphorylation	3/326	27/18862	0.0110063	0.0600153	0.0434094	VEGFC/GREM1/GPNMB	3
BP	GO:0032967	positive regulation of collagen biosynthetic process	3/326	27/18862	0.0110063	0.0600153	0.0434094	TGFB3/PDGFRB/VIM	3
BP	GO:0034110	regulation of homotypic cell-cell adhesion	3/326	27/18862	0.0110063	0.0600153	0.0434094	LGALS1/PDPN/SERPINE2	3
BP	GO:0045671	negative regulation of osteoclast differentiation	3/326	27/18862	0.0110063	0.0600153	0.0434094	FBN1/MAFB/SFRP1	3
BP	GO:0060512	prostate gland morphogenesis	3/326	27/18862	0.0110063	0.0600153	0.0434094	SULF1/TNC/SFRP1	3
BP	GO:0071624	positive regulation of granulocyte chemotaxis	3/326	27/18862	0.0110063	0.0600153	0.0434094	THBS4/CCL21/CCL19	3
BP	GO:0090025	regulation of monocyte chemotaxis	3/326	27/18862	0.0110063	0.0600153	0.0434094	SLIT2/GREM1/CXCL12	3
BP	GO:1903020	positive regulation of glycoprotein metabolic process	3/326	27/18862	0.0110063	0.0600153	0.0434094	IL33/CCL21/CCL19	3
BP	GO:1903318	negative regulation of protein maturation	3/326	27/18862	0.0110063	0.0600153	0.0434094	GAS1/THBS1/SERPINE2	3
BP	GO:0031669	cellular response to nutrient levels	9/326	210/18862	0.0110439	0.0601261	0.0434895	PRKD1/MN1/COL1A1/TNC/KANK2/SNAI2/POSTN/SFRP1/PDK4	9
BP	GO:0001938	positive regulation of endothelial cell proliferation	6/326	108/18862	0.0111805	0.0607743	0.0439583	VEGFC/PRKD1/THBS4/CXCL12/TEK/VIP	6
BP	GO:0050804	modulation of chemical synaptic transmission	14/326	405/18862	0.0112102	0.0608404	0.0440061	CDH11/TSHZ3/LAMA2/SYT11/MAP1A/ROR2/LZTS1/RGS4/MAP1B/CCL2/AKAP12/SERPINE2/ATP1A2/TACR2	14
BP	GO:0001570	vasculogenesis	5/326	78/18862	0.0112999	0.0610405	0.0441509	PDGFRB/HEG1/CAV1/FOXF1/TMEM100	5
BP	GO:0032272	negative regulation of protein polymerization	5/326	78/18862	0.0112999	0.0610405	0.0441509	SLIT2/CLIP3/LMOD1/SVIL/TMOD1	5
BP	GO:2001057	reactive nitrogen species metabolic process	5/326	78/18862	0.0112999	0.0610405	0.0441509	PKD2/CYP1B1/PTGIS/CAV1/ATP2B4	5
BP	GO:0099177	regulation of trans-synaptic signaling	14/326	406/18862	0.0114352	0.0616756	0.0446103	CDH11/TSHZ3/LAMA2/SYT11/MAP1A/ROR2/LZTS1/RGS4/MAP1B/CCL2/AKAP12/SERPINE2/ATP1A2/TACR2	14
BP	GO:0043277	apoptotic cell clearance	4/326	51/18862	0.0115692	0.062301	0.0450626	THBS1/AXL/CCL2/C3	4
BP	GO:0008406	gonad development	9/326	212/18862	0.0116967	0.0628904	0.0454889	SFRP2/PDGFRB/SLIT2/SFRP1/SLIT3/TCF21/PDGFRA/ADAMTS1/FLNA	9
BP	GO:0042310	vasoconstriction	5/326	79/18862	0.0118974	0.063197	0.0457107	EDNRA/ACTA2/CAV1/ATP1A2/COMP	5
BP	GO:0007565	female pregnancy	8/326	177/18862	0.0120314	0.063197	0.0457107	TGFB3/IGFBP7/SYDE1/RECK/MMP2/IGFBP5/ITGA5/COL16A1	8
BP	GO:0043433	negative regulation of DNA-binding transcription factor activity	8/326	177/18862	0.0120314	0.063197	0.0457107	NDN/SFRP4/PKD2/CYP1B1/PTGIS/HEYL/HAND2/FLNA	8
BP	GO:0001958	endochondral ossification	3/326	28/18862	0.0121719	0.063197	0.0457107	TMEM119/COL1A1/TEK	3
BP	GO:0010575	positive regulation of vascular endothelial growth factor production	3/326	28/18862	0.0121719	0.063197	0.0457107	SULF1/CYP1B1/C3	3
BP	GO:0010714	positive regulation of collagen metabolic process	3/326	28/18862	0.0121719	0.063197	0.0457107	TGFB3/PDGFRB/VIM	3
BP	GO:0021988	olfactory lobe development	3/326	28/18862	0.0121719	0.063197	0.0457107	SLIT2/CSF1R/ATP1A2	3
BP	GO:0036075	replacement ossification	3/326	28/18862	0.0121719	0.063197	0.0457107	TMEM119/COL1A1/TEK	3
BP	GO:0086011	membrane repolarization during action potential	3/326	28/18862	0.0121719	0.063197	0.0457107	KCNJ8/CAV1/FLNA	3
BP	GO:1902547	regulation of cellular response to vascular endothelial growth factor stimulus	3/326	28/18862	0.0121719	0.063197	0.0457107	DCN/SMOC2/ATP2B4	3
BP	GO:0014820	tonic smooth muscle contraction	2/326	10/18862	0.0122276	0.063197	0.0457107	EDNRA/MYLK	2
BP	GO:0032060	bleb assembly	2/326	10/18862	0.0122276	0.063197	0.0457107	PMP22/MYLK	2
BP	GO:0032341	aldosterone metabolic process	2/326	10/18862	0.0122276	0.063197	0.0457107	DKK3/CACNA1H	2
BP	GO:0032342	aldosterone biosynthetic process	2/326	10/18862	0.0122276	0.063197	0.0457107	DKK3/CACNA1H	2
BP	GO:0034350	regulation of glial cell apoptotic process	2/326	10/18862	0.0122276	0.063197	0.0457107	CCL2/AKAP12	2
BP	GO:0034651	cortisol biosynthetic process	2/326	10/18862	0.0122276	0.063197	0.0457107	DKK3/CACNA1H	2
BP	GO:0035581	sequestering of extracellular ligand from receptor	2/326	10/18862	0.0122276	0.063197	0.0457107	FBN1/GREM1	2
BP	GO:0070099	regulation of chemokine-mediated signaling pathway	2/326	10/18862	0.0122276	0.063197	0.0457107	SLIT2/SLIT3	2
BP	GO:0071670	smooth muscle cell chemotaxis	2/326	10/18862	0.0122276	0.063197	0.0457107	PDGFRB/SLIT2	2
BP	GO:0072537	fibroblast activation	2/326	10/18862	0.0122276	0.063197	0.0457107	PDGFRB/AKAP12	2
BP	GO:0090179	planar cell polarity pathway involved in neural tube closure	2/326	10/18862	0.0122276	0.063197	0.0457107	SFRP2/SFRP1	2
BP	GO:0097084	vascular associated smooth muscle cell development	2/326	10/18862	0.0122276	0.063197	0.0457107	EFEMP2/COMP	2
BP	GO:0097278	complement-dependent cytotoxicity	2/326	10/18862	0.0122276	0.063197	0.0457107	CFH/C3	2
BP	GO:0098903	regulation of membrane repolarization during action potential	2/326	10/18862	0.0122276	0.063197	0.0457107	CAV1/FLNA	2
BP	GO:1902645	tertiary alcohol biosynthetic process	2/326	10/18862	0.0122276	0.063197	0.0457107	DKK3/CACNA1H	2
BP	GO:1904338	regulation of dopaminergic neuron differentiation	2/326	10/18862	0.0122276	0.063197	0.0457107	SFRP2/SFRP1	2
BP	GO:0051496	positive regulation of stress fiber assembly	4/326	52/18862	0.0123667	0.0637262	0.0460934	TGFB3/FERMT2/SFRP1/TPM1	4
BP	GO:0060350	endochondral bone morphogenesis	4/326	52/18862	0.0123667	0.0637262	0.0460934	TMEM119/COL1A1/TEK/COMP	4
BP	GO:0045445	myoblast differentiation	5/326	80/18862	0.0125161	0.0644004	0.0465811	GREM1/LGALS1/BOC/PRICKLE1/SMYD1	5
BP	GO:0046660	female sex differentiation	6/326	111/18862	0.0126786	0.0651397	0.0471159	SLIT2/AXL/SFRP1/SLIT3/PDGFRA/ADAMTS1	6
BP	GO:1903169	regulation of calcium ion transmembrane transport	7/326	145/18862	0.0131531	0.0671621	0.0485787	THY1/PKD2/GEM/PLN/CASQ2/ATP1A2/JPH2	7
BP	GO:0010524	positive regulation of calcium ion transport into cytosol	4/326	53/18862	0.0131986	0.0671621	0.0485787	THY1/PKD2/CAV1/JPH2	4
BP	GO:0021885	forebrain cell migration	4/326	53/18862	0.0131986	0.0671621	0.0485787	SLIT2/AXL/CXCL12/DIXDC1	4
BP	GO:0045806	negative regulation of endocytosis	4/326	53/18862	0.0131986	0.0671621	0.0485787	PRKD1/SYT11/CAV1/EPHA3	4
BP	GO:0048747	muscle fiber development	4/326	53/18862	0.0131986	0.0671621	0.0485787	MYH11/LOX/FLNC/COMP	4
BP	GO:0030326	embryonic limb morphogenesis	6/326	112/18862	0.0132078	0.0671621	0.0485787	PRRX1/SFRP2/GREM1/RECK/ROR2/HAND2	6
BP	GO:0035113	embryonic appendage morphogenesis	6/326	112/18862	0.0132078	0.0671621	0.0485787	PRRX1/SFRP2/GREM1/RECK/ROR2/HAND2	6
BP	GO:0051604	protein maturation	11/326	293/18862	0.0133665	0.0676726	0.0489479	GAS1/C1R/THBS1/SPON1/CPXM2/ADAMTS2/CPXM1/CPE/SERPINE2/COMP/CTSG	11
BP	GO:0010880	regulation of release of sequestered calcium ion into cytosol by sarcoplasmic reticulum	3/326	29/18862	0.0134057	0.0676726	0.0489479	PLN/CASQ2/ATP1A2	3
BP	GO:0061311	cell surface receptor signaling pathway involved in heart development	3/326	29/18862	0.0134057	0.0676726	0.0489479	HEYL/SNAI2/HAND2	3
BP	GO:1901380	negative regulation of potassium ion transmembrane transport	3/326	29/18862	0.0134057	0.0676726	0.0489479	RGS4/CAV1/CASQ2	3
BP	GO:1902624	positive regulation of neutrophil migration	3/326	29/18862	0.0134057	0.0676726	0.0489479	THBS4/CCL21/CCL19	3
BP	GO:0045137	development of primary sexual characteristics	9/326	217/18862	0.0134548	0.0678216	0.0490557	SFRP2/PDGFRB/SLIT2/SFRP1/SLIT3/TCF21/PDGFRA/ADAMTS1/FLNA	9
BP	GO:0043409	negative regulation of MAPK cascade	8/326	181/18862	0.0136191	0.0685503	0.0495828	TIMP3/SFRP2/EMILIN1/DACT1/FBLN1/RGS4/SFRP1/CAV1	8
CC	GO:0062023	collagen-containing extracellular matrix	86/342	423/19520	2.83944e-67	9.17139e-65	7.2331e-65	SPARC/COL8A1/TIMP2/TIMP3/TGFB3/COL6A3/ANGPTL2/COL3A1/FBN1/EFEMP2/FBLN2/SFRP2/DCN/BGN/IGFBP7/PODN/EMILIN1/COL1A2/THBS2/LUM/SERPINF1/COL8A2/COL6A2/AEBP1/LAMA4/OMD/CCDC80/LAMA2/COL5A1/PCOLCE/COL15A1/SPARCL1/THBS4/GREM1/MGP/MFAP5/RARRES2/COL5A2/MXRA7/THBS1/VCAN/SULF1/HTRA1/TGFB1I1/LGALS1/SPON1/COL14A1/EFEMP1/MMP2/FBLN1/SERPING1/SRPX/MFAP4/COL6A1/CILP/SRPX2/COL1A1/FBLN5/CXCL12/TNC/OGN/COL12A1/POSTN/SF…	86
CC	GO:0005581	collagen trimer	22/342	87/19520	9.40307e-20	1.5186e-17	1.19765e-17	COL8A1/COL6A3/COL3A1/DCN/EMILIN1/COL1A2/LUM/COL8A2/COL6A2/COL5A1/COL15A1/COLEC12/COL5A2/COL14A1/COL6A1/COL1A1/COL12A1/COL10A1/CTHRC1/COL16A1/LOX/COL11A1	22
CC	GO:0005788	endoplasmic reticulum lumen	34/342	306/19520	8.64336e-18	9.30602e-16	7.33928e-16	COL8A1/FSTL1/COL6A3/COL3A1/FBN1/IGFBP7/COL1A2/COL8A2/COL6A2/COL5A1/COL15A1/SPARCL1/COL5A2/THBS1/VCAN/MXRA8/LGALS1/SPON1/COL14A1/IGFBP4/COL6A1/IGFBP5/COL1A1/TNC/COL12A1/FAM20C/PRSS23/CERCAM/COL10A1/COL16A1/CASQ2/CHRDL1/C3/COL11A1	34
CC	GO:0043292	contractile fiber	26/342	231/19520	5.31019e-14	4.28798e-12	3.38175e-12	PDLIM3/CALD1/FERMT2/KCNJ8/ACTA2/PALLD/MYL9/MMP2/CRYAB/LMOD1/FBXO32/TPM2/NEXN/PGM5/SVIL/MYH11/ATP2B4/TPM1/CSRP1/SYNPO2/FLNC/CASQ2/DES/FLNA/TMOD1/JPH2	26
CC	GO:0030016	myofibril	24/342	224/19520	1.50322e-12	9.71078e-11	7.65849e-11	PDLIM3/CALD1/FERMT2/KCNJ8/PALLD/MYL9/MMP2/CRYAB/LMOD1/FBXO32/TPM2/NEXN/PGM5/SVIL/ATP2B4/TPM1/CSRP1/SYNPO2/FLNC/CASQ2/DES/FLNA/TMOD1/JPH2	24
CC	GO:0005925	focal adhesion	32/342	416/19520	2.53814e-12	1.36636e-10	1.0776e-10	DDR2/FAP/PDGFRB/FERMT2/VIM/LAYN/SCARF2/THY1/PALLD/TGFB1I1/TSPAN9/FLRT2/TEK/TNC/DIXDC1/CNN1/TNS1/ITGA11/ITGA5/LIMS2/NEXN/FHL1/PGM5/SVIL/CAV1/CSRP1/ITGBL1/SYNPO2/SORBS1/FLNC/AKAP12/FLNA	32
CC	GO:0005583	fibrillar collagen trimer	8/342	12/19520	3.81197e-12	1.42085e-10	1.12056e-10	COL3A1/COL1A2/LUM/COL5A1/COL5A2/COL1A1/COL16A1/COL11A1	8
CC	GO:0098643	banded collagen fibril	8/342	12/19520	3.81197e-12	1.42085e-10	1.12056e-10	COL3A1/COL1A2/LUM/COL5A1/COL5A2/COL1A1/COL16A1/COL11A1	8
CC	GO:0030055	cell-substrate junction	32/342	423/19520	3.95902e-12	1.42085e-10	1.12056e-10	DDR2/FAP/PDGFRB/FERMT2/VIM/LAYN/SCARF2/THY1/PALLD/TGFB1I1/TSPAN9/FLRT2/TEK/TNC/DIXDC1/CNN1/TNS1/ITGA11/ITGA5/LIMS2/NEXN/FHL1/PGM5/SVIL/CAV1/CSRP1/ITGBL1/SYNPO2/SORBS1/FLNC/AKAP12/FLNA	32
CC	GO:0005604	basement membrane	16/342	94/19520	7.40433e-12	2.3916e-10	1.88616e-10	SPARC/COL8A1/FBN1/EFEMP2/SERPINF1/COL8A2/LAMA4/CCDC80/LAMA2/COL5A1/COL15A1/THBS4/TNC/SMOC2/TGFBI/ADAMTS1	16
CC	GO:0098644	complex of collagen trimers	9/342	21/19520	3.42168e-11	1.00473e-09	7.9239e-10	COL8A1/COL3A1/COL1A2/LUM/COL5A1/COL5A2/COL1A1/COL16A1/COL11A1	9
CC	GO:0030017	sarcomere	21/342	203/19520	7.54128e-11	2.02986e-09	1.60087e-09	PDLIM3/FERMT2/PALLD/MYL9/MMP2/CRYAB/LMOD1/FBXO32/TPM2/NEXN/PGM5/ATP2B4/TPM1/CSRP1/SYNPO2/FLNC/CASQ2/DES/FLNA/TMOD1/JPH2	21
CC	GO:0042383	sarcolemma	17/342	134/19520	2.04905e-10	5.0911e-09	4.01515e-09	TGFB3/COL6A3/BGN/COL6A2/KCNJ8/LAMA2/SGCD/COL6A1/SSPN/PGM5/CAV1/SGCE/ATP2B4/FLNC/POPDC2/DES/ATP1A2	17
CC	GO:0032432	actin filament bundle	13/342	73/19520	3.91343e-10	9.02883e-09	7.12067e-09	PDLIM3/FERMT2/PALLD/MYL9/MYLK/CRYAB/TEK/PGM5/MYH10/TPM1/SYNPO2/SORBS1/FLNA	13
CC	GO:0031674	I band	16/342	134/19520	1.74113e-09	3.74922e-08	2.95686e-08	PDLIM3/FERMT2/PALLD/MYL9/CRYAB/FBXO32/NEXN/PGM5/ATP2B4/CSRP1/SYNPO2/FLNC/CASQ2/DES/FLNA/JPH2	16
CC	GO:0030018	Z disc	15/342	122/19520	3.7515e-09	7.57333e-08	5.97278e-08	PDLIM3/PALLD/MYL9/CRYAB/FBXO32/NEXN/PGM5/ATP2B4/CSRP1/SYNPO2/FLNC/CASQ2/DES/FLNA/JPH2	15
CC	GO:0001725	stress fiber	11/342	64/19520	1.32082e-08	2.37014e-07	1.86923e-07	PDLIM3/FERMT2/PALLD/MYL9/MYLK/TEK/PGM5/MYH10/TPM1/SYNPO2/SORBS1	11
CC	GO:0097517	contractile actin filament bundle	11/342	64/19520	1.32082e-08	2.37014e-07	1.86923e-07	PDLIM3/FERMT2/PALLD/MYL9/MYLK/TEK/PGM5/MYH10/TPM1/SYNPO2/SORBS1	11
CC	GO:0042641	actomyosin	11/342	74/19520	6.35138e-08	1.07973e-06	8.51542e-07	PDLIM3/FERMT2/PALLD/MYL9/MYLK/TEK/PGM5/MYH10/TPM1/SYNPO2/SORBS1	11
CC	GO:0005884	actin filament	13/342	113/19520	9.28184e-08	1.49902e-06	1.18221e-06	DPYSL3/PDLIM3/JAM3/PALLD/PKD2/GAS7/TEK/LMOD1/TPM2/TPM1/SMTN/FLNA/TMOD1	13
CC	GO:0031091	platelet alpha granule	11/342	91/19520	5.51668e-07	8.48518e-06	6.69192e-06	SPARC/TGFB3/THBS2/VEGFC/ISLR/THBS1/SERPING1/F13A1/SERPINE2/A2M/CFD	11
CC	GO:0043202	lysosomal lumen	11/342	96/19520	9.50971e-07	1.3962e-05	1.10112e-05	DCN/BGN/PDGFRB/LUM/CTSK/OMD/VCAN/OGN/PRELP/FMOD/EPDR1	11
CC	GO:0031093	platelet alpha granule lumen	9/342	67/19520	2.44931e-06	3.43968e-05	2.71273e-05	SPARC/TGFB3/VEGFC/ISLR/THBS1/SERPING1/F13A1/A2M/CFD	9
CC	GO:0005775	vacuolar lumen	13/342	173/19520	1.18618e-05	0.000157833	0.000124476	DCN/BGN/PDGFRB/LUM/CTSK/OMD/VCAN/OGN/PRELP/FMOD/EPDR1/CTSG/C3	13
CC	GO:0005796	Golgi lumen	10/342	102/19520	1.22162e-05	0.000157833	0.000124476	DCN/BGN/LUM/OMD/VCAN/OGN/PRELP/SOD3/FMOD/MMP11	10
CC	GO:0098636	protein complex involved in cell adhesion	6/342	36/19520	3.4599e-05	0.000429826	0.000338986	JAM3/EMILIN1/JAM2/ITGA11/ITGA5/ITGBL1	6
CC	GO:0001527	microfibril	4/342	12/19520	4.10107e-05	0.000490609	0.000386923	FBN1/EFEMP2/MFAP5/MFAP4	4
CC	GO:0005911	cell-cell junction	22/342	485/19520	5.00465e-05	0.000577322	0.00045531	CDH11/PDLIM3/JAM3/FERMT2/HEG1/MPDZ/MXRA8/PKD2/FLRT2/JAM2/TEK/CLIC4/TMEM47/CNTNAP1/ITGA5/LIMS2/NEXN/PGM5/SORBS1/DES/ATP1A2/FLNA	22
CC	GO:0034774	secretory granule lumen	16/342	322/19520	0.000192408	0.00214303	0.00169012	SPARC/TIMP2/TIMP3/TGFB3/CRISPLD2/VEGFC/ISLR/RARRES2/THBS1/SERPING1/F13A1/A2M/CTSG/C3/CFD/LCN2	16
CC	GO:0031941	filamentous actin	5/342	32/19520	0.000218823	0.00230454	0.0018175	DPYSL3/PDLIM3/JAM3/PKD2/SMTN	5
CC	GO:0060205	cytoplasmic vesicle lumen	16/342	326/19520	0.000221179	0.00230454	0.0018175	SPARC/TIMP2/TIMP3/TGFB3/CRISPLD2/VEGFC/ISLR/RARRES2/THBS1/SERPING1/F13A1/A2M/CTSG/C3/CFD/LCN2	16
CC	GO:0031983	vesicle lumen	16/342	328/19520	0.000236916	0.00239137	0.00188597	SPARC/TIMP2/TIMP3/TGFB3/CRISPLD2/VEGFC/ISLR/RARRES2/THBS1/SERPING1/F13A1/A2M/CTSG/C3/CFD/LCN2	16
CC	GO:0016010	dystrophin-associated glycoprotein complex	4/342	19/19520	0.00029142	0.00276849	0.0021834	SGCD/SSPN/PGM5/SGCE	4
CC	GO:0090665	glycoprotein complex	4/342	19/19520	0.00029142	0.00276849	0.0021834	SGCD/SSPN/PGM5/SGCE	4
CC	GO:0031252	cell leading edge	18/342	411/19520	0.000367013	0.00338701	0.00267119	FAP/DPYSL3/ANTXR1/FERMT2/VIM/LAYN/ACTA2/THY1/PALLD/PKD2/MYLK/ITGA5/PDPN/SGCE/MYH10/TPM1/PALM/ACTG2	18
CC	GO:0016528	sarcoplasm	7/342	79/19520	0.000468801	0.00420618	0.00331724	SPOCK1/THBS4/THBS1/PLN/FLNC/CASQ2/JPH2	7
CC	GO:0005865	striated muscle thin filament	4/342	22/19520	0.000527637	0.00448492	0.00353707	LMOD1/TPM2/TPM1/TMOD1	4
CC	GO:0031258	lamellipodium membrane	4/342	22/19520	0.000527637	0.00448492	0.00353707	FAP/ANTXR1/FERMT2/PDPN	4
CC	GO:0030027	lamellipodium	11/342	196/19520	0.000706727	0.00585315	0.00461614	FAP/DPYSL3/ANTXR1/FERMT2/ACTA2/PALLD/PKD2/MYLK/PDPN/MYH10/ACTG2	11
CC	GO:0036379	myofilament	4/342	26/19520	0.00102045	0.00824013	0.00649865	LMOD1/TPM2/TPM1/TMOD1	4
CC	GO:0008305	integrin complex	4/342	31/19520	0.00200491	0.0157948	0.0124567	EMILIN1/ITGA11/ITGA5/ITGBL1	4
CC	GO:0031256	leading edge membrane	9/342	173/19520	0.00352455	0.0262674	0.020716	FAP/ANTXR1/FERMT2/THY1/ITGA5/PDPN/SGCE/TPM1/PALM	9
CC	GO:0031527	filopodium membrane	3/342	18/19520	0.00357822	0.0262674	0.020716	ANTXR1/PDPN/PALM	3
CC	GO:0043034	costamere	3/342	18/19520	0.00357822	0.0262674	0.020716	PGM5/SVIL/FLNC	3
CC	GO:0016460	myosin II complex	3/342	19/19520	0.0041945	0.0299378	0.0236107	MYL9/MYH11/MYH10	3
CC	GO:0072562	blood microparticle	8/342	146/19520	0.00426358	0.0299378	0.0236107	C1S/C1R/SERPING1/F13A1/ACTG2/CFH/A2M/C3	8
CC	GO:0043025	neuronal cell body	17/342	474/19520	0.0043985	0.030228	0.0238395	TIMP2/TGFB3/NDN/SERPINF1/THY1/SYT11/MAP1A/ROR2/CRYAB/PDE1A/MAP1B/AKAP12/ATP1A2/TMEM100/FLNA/APOD/VIP	17
CC	GO:0044304	main axon	5/342	62/19520	0.00458537	0.0308557	0.0243347	SPOCK1/THY1/MAP1A/CNTNAP1/MAP1B	5
CC	GO:0098858	actin-based cell projection	10/342	216/19520	0.0049269	0.0324773	0.0256135	JAM3/ANTXR1/ACTA2/TEK/CLIC4/PDPN/PALM/PDGFRA/ACTG2/AOC3	10
CC	GO:0005902	microvillus	6/342	91/19520	0.00529994	0.0342376	0.0270018	JAM3/TEK/CLIC4/PDPN/PDGFRA/AOC3	6
CC	GO:0032982	myosin filament	3/342	22/19520	0.00641275	0.0406141	0.0320307	MYH11/MYH10/ACTG2	3
CC	GO:0031594	neuromuscular junction	5/342	69/19520	0.00721353	0.0439617	0.0346708	SPOCK1/LAMA2/POSTN/SERPINE2/DES	5
CC	GO:0044291	cell-cell contact zone	5/342	69/19520	0.00721353	0.0439617	0.0346708	JAM3/JAM2/PGM5/DES/ATP1A2	5
CC	GO:0016529	sarcoplasmic reticulum	5/342	70/19520	0.0076596	0.0458158	0.036133	THBS4/THBS1/PLN/CASQ2/JPH2	5
MF	GO:0005201	extracellular matrix structural constituent	56/327	170/18337	6.42555e-56	2.75014e-53	2.29967e-53	SPARC/COL8A1/COL6A3/COL3A1/FBN1/EFEMP2/FBLN2/DCN/BGN/IGFBP7/PODN/EMILIN1/COL1A2/THBS2/LUM/COL8A2/COL6A2/AEBP1/LAMA4/LAMA2/COL5A1/PCOLCE/COL15A1/MGP/MFAP5/COL5A2/THBS1/VCAN/SPON1/COL14A1/EFEMP1/FBLN1/SRPX/MFAP4/COL6A1/CILP/SRPX2/COL1A1/FBLN5/TNC/OGN/COL12A1/POSTN/COL10A1/TGFBI/ELN/PRELP/CTHRC1/COL16A1/ABI3BP/FMOD/MXRA5/DPT/FGL2/COMP/COL11A1	56
MF	GO:0005539	glycosaminoglycan binding	33/327	228/18337	1.14103e-20	2.4418e-18	2.04184e-18	FSTL1/ECM2/DPYSL3/FBN1/EFEMP2/DCN/BGN/CRISPLD2/THBS2/SLIT2/LAYN/CCDC80/COL5A1/PCOLCE/THBS4/THBS1/VCAN/SULF1/RSPO3/FGF7/POSTN/SFRP1/SLIT3/SMOC2/PRELP/GPNMB/SOD3/CFH/ADAMTS1/SERPINE2/COMP/CTSG/COL11A1	33
MF	GO:0008201	heparin binding	27/327	164/18337	1.3872e-18	1.97908e-16	1.65491e-16	FSTL1/ECM2/FBN1/EFEMP2/CRISPLD2/THBS2/SLIT2/CCDC80/COL5A1/PCOLCE/THBS4/THBS1/RSPO3/FGF7/POSTN/SFRP1/SLIT3/SMOC2/PRELP/GPNMB/SOD3/CFH/ADAMTS1/SERPINE2/COMP/CTSG/COL11A1	27
MF	GO:0030020	extracellular matrix structural constituent conferring tensile strength	16/327	41/18337	4.99704e-18	4.57813e-16	3.82824e-16	COL8A1/COL6A3/COL3A1/COL1A2/COL8A2/COL6A2/COL5A1/COL15A1/COL5A2/COL14A1/COL6A1/COL1A1/COL12A1/COL10A1/COL16A1/COL11A1	16
MF	GO:0005518	collagen binding	19/327	68/18337	5.34828e-18	4.57813e-16	3.82824e-16	SPARC/DDR2/ECM2/DCN/ANTXR1/PODN/LUM/CTSK/COL6A2/AEBP1/PCOLCE/SPARCL1/THBS1/COL14A1/COL6A1/ITGA11/TGFBI/LOX/COMP	19
MF	GO:0005178	integrin binding	22/327	142/18337	8.6136e-15	6.14437e-13	5.13794e-13	TIMP2/FAP/ECM2/COL3A1/FBN1/SFRP2/JAM3/EMILIN1/FERMT2/COL5A1/THY1/THBS4/THBS1/JAM2/FBLN5/CXCL12/ITGA5/TGFBI/GPNMB/COL16A1/ITGBL1/COMP	22
MF	GO:1901681	sulfur compound binding	28/327	260/18337	2.50759e-14	1.53321e-12	1.28207e-12	FSTL1/ECM2/DPYSL3/FBN1/EFEMP2/CRISPLD2/THBS2/SLIT2/CCDC80/COL5A1/PCOLCE/THBS4/THBS1/RSPO3/FGF7/POSTN/SFRP1/SLIT3/SMOC2/PRELP/GPNMB/SOD3/CFH/ADAMTS1/SERPINE2/COMP/CTSG/COL11A1	28
MF	GO:0019838	growth factor binding	19/327	137/18337	4.61765e-12	2.47044e-10	2.06579e-10	TGFB3/LRRC32/COL3A1/IGFBP7/PDGFRB/COL1A2/COL5A1/THBS1/HTRA1/IGFBP4/COL6A1/IGFBP5/IGFBP6/SRPX2/COL1A1/TEK/GHR/PDGFRA/A2M	19
MF	GO:0050840	extracellular matrix binding	13/327	55/18337	1.07676e-11	5.12058e-10	4.28184e-10	SPARC/FBLN2/DCN/BGN/SLIT2/SPARCL1/THBS1/CD248/LGALS1/SMOC2/TGFBI/ELN/COL11A1	13
MF	GO:0048407	platelet-derived growth factor binding	7/327	11/18337	1.67008e-10	7.14795e-09	5.97713e-09	COL3A1/PDGFRB/COL1A2/COL5A1/COL6A1/COL1A1/PDGFRA	7
MF	GO:0030021	extracellular matrix structural constituent conferring compression resistance	8/327	22/18337	2.4159e-09	9.40003e-08	7.86033e-08	DCN/BGN/PODN/LUM/VCAN/OGN/PRELP/FMOD	8
MF	GO:0003779	actin binding	28/327	439/18337	6.23058e-09	2.22224e-07	1.85824e-07	PDLIM3/CALD1/ANTXR1/FERMT2/TAGLN/MAP1A/PALLD/GAS7/MYLK/DIXDC1/CNN1/TNS1/MAP1B/LMOD1/TPM2/NEXN/SVIL/KCNMA1/MYH11/MYH10/TPM1/SYNPO2/CAP2/SORBS1/SMTN/FLNC/FLNA/TMOD1	28
MF	GO:0004714	transmembrane receptor protein tyrosine kinase activity	10/327	61/18337	1.1422e-07	3.76046e-06	3.14451e-06	DDR2/PDGFRB/AXL/ROR2/EFEMP1/PDGFRL/TEK/EPHA3/PDGFRA/CSF1R	10
MF	GO:0043394	proteoglycan binding	8/327	36/18337	1.83915e-07	5.62254e-06	4.70159e-06	SLIT2/CTSK/COL5A1/THBS1/TNC/GPNMB/CFH/COMP	8
MF	GO:0001968	fibronectin binding	7/327	28/18337	4.6155e-07	1.31696e-05	1.10124e-05	SFRP2/CTSK/CCDC80/THBS1/FBLN1/IGFBP5/IGFBP6	7
MF	GO:0097493	structural molecule activity conferring elasticity	5/327	11/18337	7.40026e-07	1.93763e-05	1.62025e-05	FBN1/FBLN2/EMILIN1/FBLN5/ELN	5
MF	GO:0017147	Wnt-protein binding	7/327	30/18337	7.6962e-07	1.93763e-05	1.62025e-05	SFRP2/SFRP4/RECK/ROR2/SFRP1/CTHRC1/FRZB	7
MF	GO:0019199	transmembrane receptor protein kinase activity	10/327	80/18337	1.54583e-06	3.67563e-05	3.07357e-05	DDR2/PDGFRB/AXL/ROR2/EFEMP1/PDGFRL/TEK/EPHA3/PDGFRA/CSF1R	10
MF	GO:0061134	peptidase regulator activity	16/327	230/18337	3.98877e-06	8.98524e-05	7.51348e-05	TIMP2/TIMP3/COL6A3/SFRP2/SPOCK1/SERPINF1/PCOLCE/RECK/FBLN1/SERPING1/CAV1/SERPINE2/A2M/PI16/C3/PI3	16
MF	GO:0008307	structural constituent of muscle	7/327	42/18337	8.48815e-06	0.000181646	0.000151893	MYL9/TPM2/NEXN/MYH11/TPM1/CSRP1/SMTN	7
MF	GO:0051371	muscle alpha-actinin binding	4/327	15/18337	0.00011602	0.00236459	0.00197728	PDLIM3/PALLD/PKD2/SYNPO2	4
MF	GO:0030414	peptidase inhibitor activity	12/327	187/18337	0.000139131	0.00267023	0.00223285	TIMP2/TIMP3/COL6A3/SPOCK1/SERPINF1/RECK/SERPING1/SERPINE2/A2M/PI16/C3/PI3	12
MF	GO:0005520	insulin-like growth factor binding	5/327	29/18337	0.000146096	0.00267023	0.00223285	IGFBP7/HTRA1/IGFBP4/IGFBP5/IGFBP6	5
MF	GO:0008191	metalloendopeptidase inhibitor activity	4/327	16/18337	0.000152526	0.00267023	0.00223285	TIMP2/TIMP3/SPOCK1/RECK	4
MF	GO:0004713	protein tyrosine kinase activity	10/327	135/18337	0.000155971	0.00267023	0.00223285	DDR2/PDGFRB/AXL/ROR2/EFEMP1/PDGFRL/TEK/EPHA3/PDGFRA/CSF1R	10
MF	GO:0061135	endopeptidase regulator activity	12/327	192/18337	0.00017815	0.00293262	0.00245226	TIMP2/TIMP3/COL6A3/SFRP2/SPOCK1/SERPINF1/RECK/SERPING1/SERPINE2/A2M/C3/PI3	12
MF	GO:0005516	calmodulin binding	12/327	198/18337	0.000236977	0.00375653	0.00314122	CALD1/AEBP1/GEM/MYLK/PDE1A/RGS4/CNN1/MYH11/MYH10/ATP2B4/AKAP12/PNCK	12
MF	GO:0004867	serine-type endopeptidase inhibitor activity	8/327	98/18337	0.00036723	0.00548561	0.00458708	COL6A3/SPOCK1/SERPINF1/RECK/SERPING1/SERPINE2/A2M/PI3	8
MF	GO:0051015	actin filament binding	12/327	208/18337	0.000371689	0.00548561	0.00458708	ANTXR1/FERMT2/TAGLN/GAS7/TPM2/NEXN/SVIL/MYH11/MYH10/TPM1/FLNA/TMOD1	12
MF	GO:0004866	endopeptidase inhibitor activity	11/327	180/18337	0.000398781	0.00568927	0.00475738	TIMP2/TIMP3/COL6A3/SPOCK1/SERPINF1/RECK/SERPING1/SERPINE2/A2M/C3/PI3	11
MF	GO:0042805	actinin binding	5/327	36/18337	0.00041877	0.00578172	0.00483469	PDLIM3/PALLD/PKD2/CSRP1/SYNPO2	5
MF	GO:0048018	receptor ligand activity	20/327	486/18337	0.000485668	0.00649581	0.00543182	TGFB3/FBN1/SFRP2/VEGFC/THBS4/GREM1/CMTM3/EFEMP1/CLEC11A/FLRT2/CXCL12/FGF7/OGN/GPNMB/IL33/CCL2/VIP/CCL21/CCL19/CCL20	20
MF	GO:0030546	signaling receptor activator activity	20/327	492/18337	0.000566482	0.0073471	0.00614366	TGFB3/FBN1/SFRP2/VEGFC/THBS4/GREM1/CMTM3/EFEMP1/CLEC11A/FLRT2/CXCL12/FGF7/OGN/GPNMB/IL33/CCL2/VIP/CCL21/CCL19/CCL20	20
MF	GO:0019955	cytokine binding	9/327	136/18337	0.000753923	0.00949056	0.00793603	TGFB3/LRRC32/GREM1/THBS1/GHR/PDPN/CSF1R/A2M/COMP	9
MF	GO:0051393	alpha-actinin binding	4/327	27/18337	0.00126007	0.0154089	0.0128849	PDLIM3/PALLD/PKD2/SYNPO2	4
MF	GO:0031994	insulin-like growth factor I binding	3/327	13/18337	0.00140728	0.016731	0.0139905	IGFBP4/IGFBP5/IGFBP6	3
MF	GO:0004857	enzyme inhibitor activity	16/327	385/18337	0.00158067	0.0182845	0.0152896	TIMP2/TIMP3/COL6A3/SPOCK1/SERPINF1/SLIT2/RECK/SERPING1/ATP2B4/PLN/SERPINE2/A2M/PI16/PPP1R14A/C3/PI3	16
MF	GO:0008009	chemokine activity	5/327	49/18337	0.00175375	0.0193977	0.0162204	CXCL12/CCL2/CCL21/CCL19/CCL20	5
MF	GO:0005172	vascular endothelial growth factor receptor binding	3/327	14/18337	0.00176755	0.0193977	0.0162204	VEGFC/GREM1/ITGA5	3
MF	GO:0005161	platelet-derived growth factor receptor binding	3/327	15/18337	0.00218043	0.0233306	0.0195091	PDGFRB/ITGA5/PDGFRA	3
MF	GO:0002020	protease binding	8/327	131/18337	0.00243698	0.0254397	0.0212727	TIMP2/FAP/TIMP3/COL3A1/COL1A2/COL1A1/A2M/COMP	8
MF	GO:0005523	tropomyosin binding	3/327	16/18337	0.00264841	0.0269885	0.0225679	CALD1/LMOD1/TMOD1	3
MF	GO:0098631	cell adhesion mediator activity	5/327	58/18337	0.00370015	0.0368294	0.0307968	JAM3/EMILIN1/PALLD/ITGA11/NEXN	5
MF	GO:0070851	growth factor receptor binding	8/327	141/18337	0.00382981	0.0372536	0.0311516	PDGFRB/VEGFC/GREM1/EFEMP1/FLRT2/FGF7/ITGA5/PDGFRA	8
MF	GO:0005109	frizzled binding	4/327	37/18337	0.00412377	0.0392216	0.0327972	ROR2/RSPO3/SFRP1/CTHRC1	4
MF	GO:0001664	G protein-coupled receptor binding	12/327	289/18337	0.00591177	0.0550051	0.0459955	ROR2/RSPO3/CXCL12/SFRP1/CTHRC1/PALM/CCL2/FLNA/C3/CCL21/CCL19/CCL20	12
